# Supplementary material for: Design of a structural framework with potential use to develop balanced multifunctional agents against Alzheimer's disease
Source: Royal Society of Chemistry journal article supplement (doi:10.1039/c4ra10692j), 2015-01-01

**Design of a structural framework with potential use to develop balanced  
multifunctional agents against Alzheimer's disease**

Neng Jiang, Xiao-Bing Wang, Zhong-Rui Li, Su-Yi Li, Sai-Sai Xie, Ming Huang and

Ling-Yi Kong\*

*State Key Laboratory of Natural Medicines, Department of Natural Medicinal*

*Chemistry, China Pharmaceutical University, 24 Tong Jia Xiang, Nanjing 210009,*

*People's Republic of China*

*\* Corresponding Author. Tel/Fax: +86-25-83271405; E-mail: cpu\_lykong@126.com  
(Ling-Yi Kong);*

**Table S1.** Permeability ( $P_e$   $10^{-6}$  cm s $^{-1}$ ) in the PAMPA-BBB Assay of 9 Commercial Drugs Used in the Experiment Validation.

| Compd          | Bibl. <sup>a</sup> | Exp. <sup>b</sup> |
|----------------|--------------------|-------------------|
| Testosterone   | 17                 | 10.50 ± 0.57      |
| Piroxicam      | 2.5                | 1.72 ± 0.03       |
| Desipramine    | 12                 | 8.94 ± 0.46       |
| Verapamil      | 16                 | 13.36 ± 0.85      |
| Lomefloxacin   | 1.1                | 0.32 ± 0.01       |
| Corticosterone | 5.1                | 1.09 ± 0.12       |
| Progesterone   | 9.3                | 8.33 ± 0.25       |
| Dopamine       | 0.2                | 0.83 ± 0.74       |
| Hydrocortisone | 1.9                | 1.14 ± 0.03       |

<sup>a</sup>Taken from Ref. 1. <sup>b</sup>Data are the mean ± SD of three independent experiments.

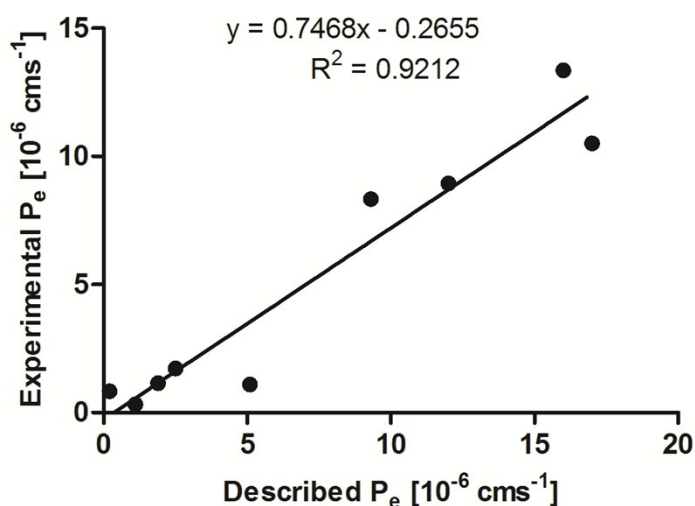

**Fig. S1.** Linear correlation between experimental and reported permeability of commercial drugs using the PAMPA-BBB assay.

## References

- [1] L. Di, E. H. Kerns, K. Fan, O. J. McConnell and G. T. Carter, *Eur. J. Med. Chem.* 2003, **38**, 223-232.

## Contents

The representative  $^1\text{H}$  NMR,  $^{13}\text{C}$  NMR spectra, IR spectra and HRMS spectra of compounds.

$^1\text{H}$  NMR of compound **3a** in DMSO

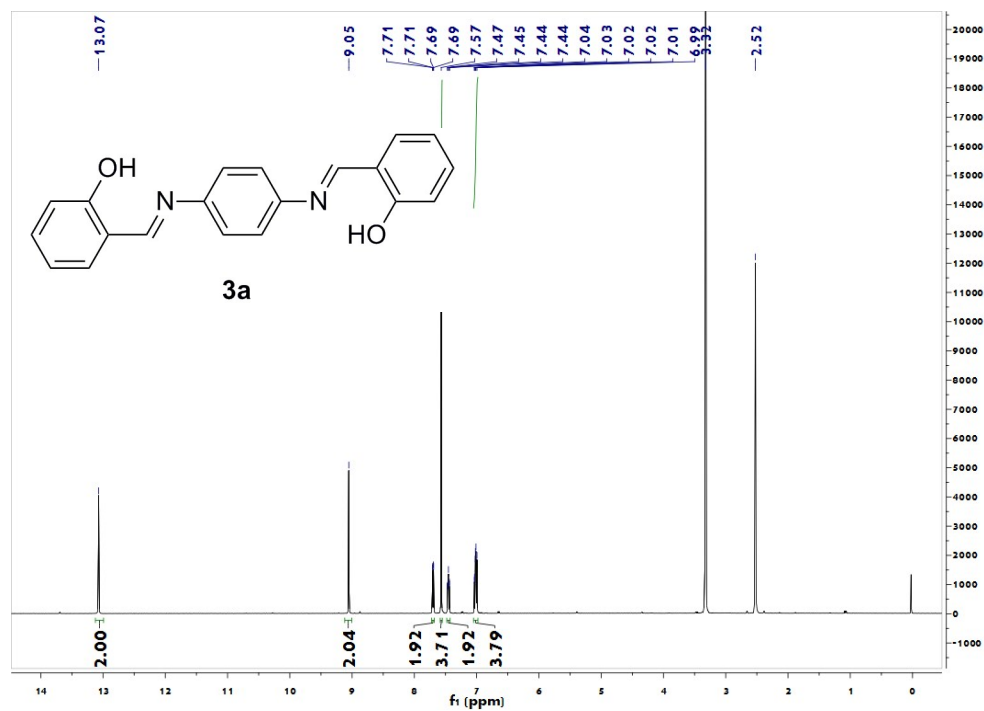

$^{13}\text{C}$  NMR of compound **3a** in DMSO

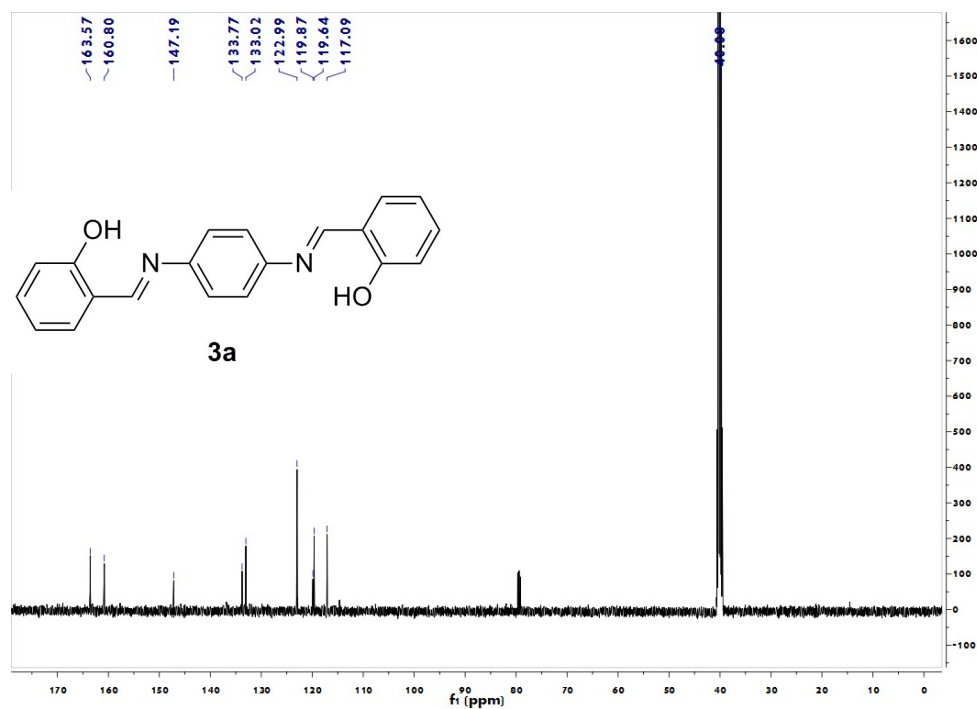

## IR of compound **3a**

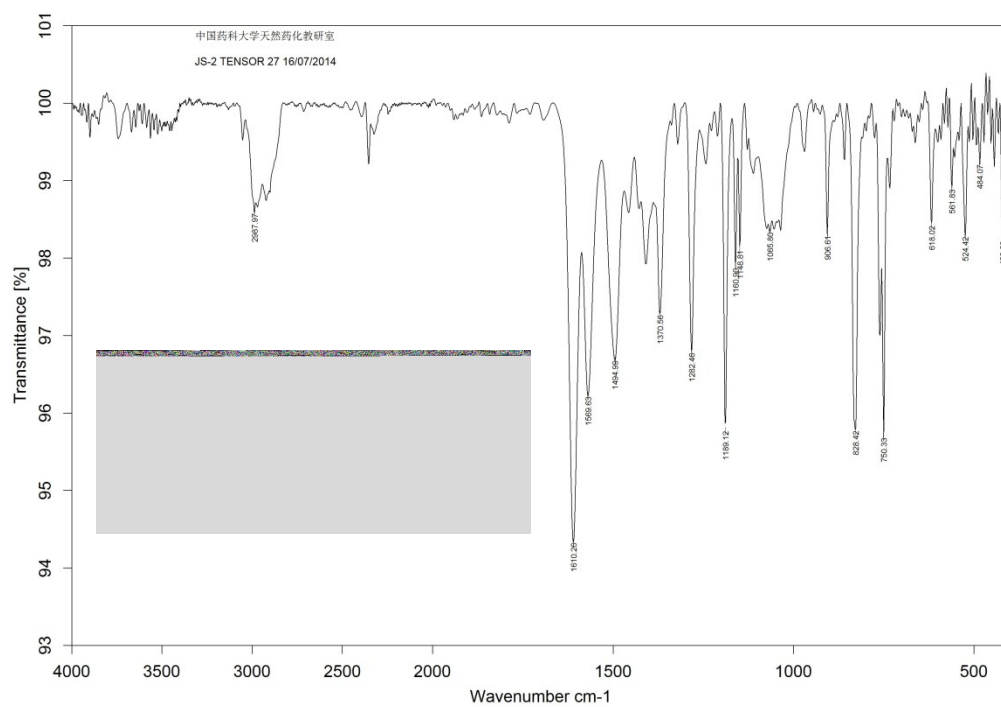

## <sup>1</sup>H NMR of compound **3b** in DMSO

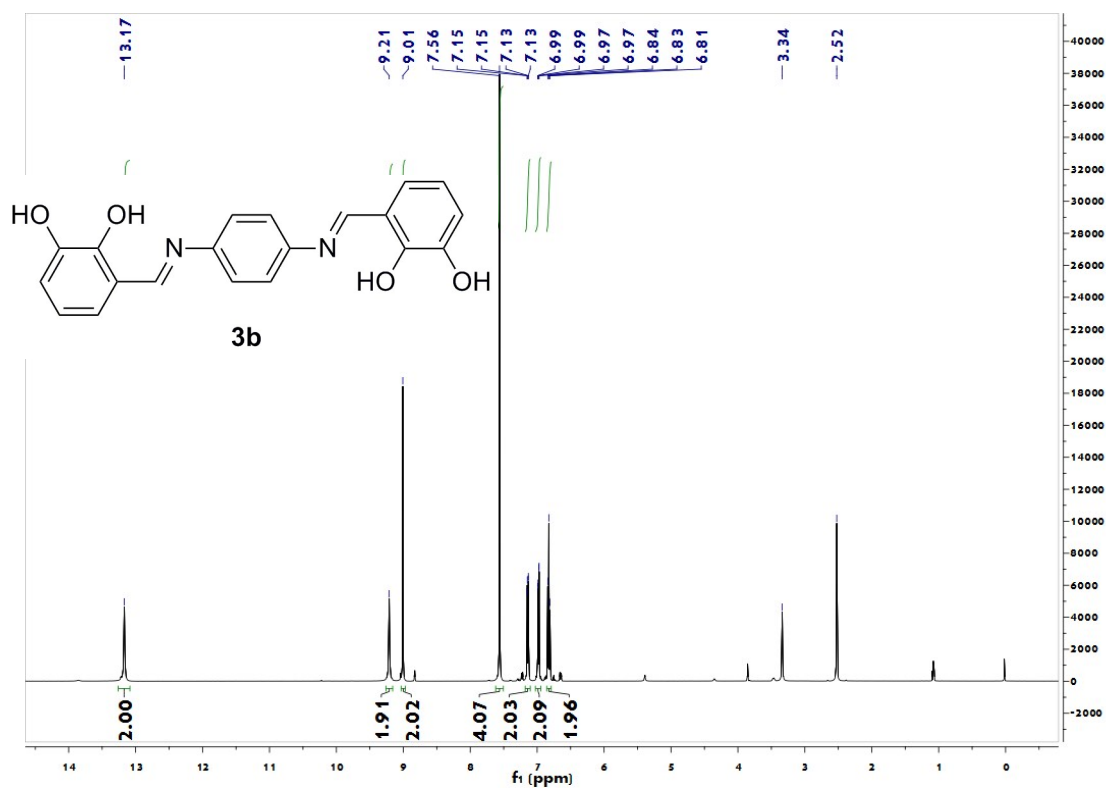

$^{13}\text{C}$  NMR of compound **3b** in DMSO

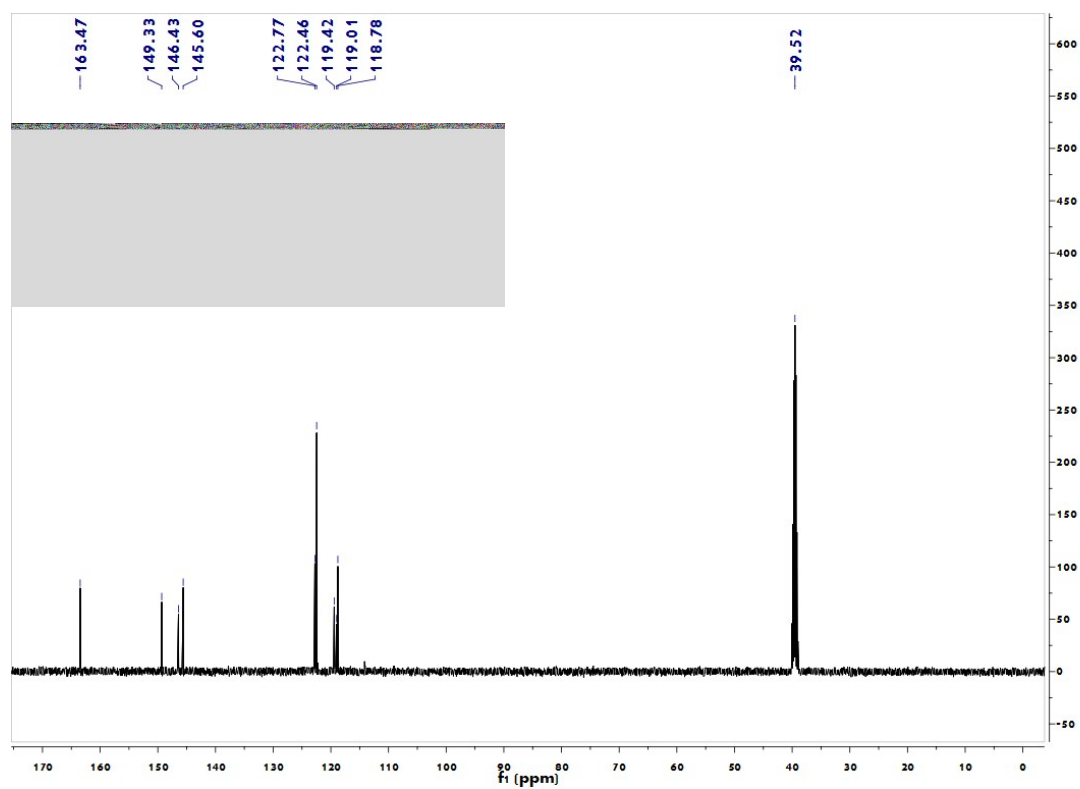

IR of compound **3b**

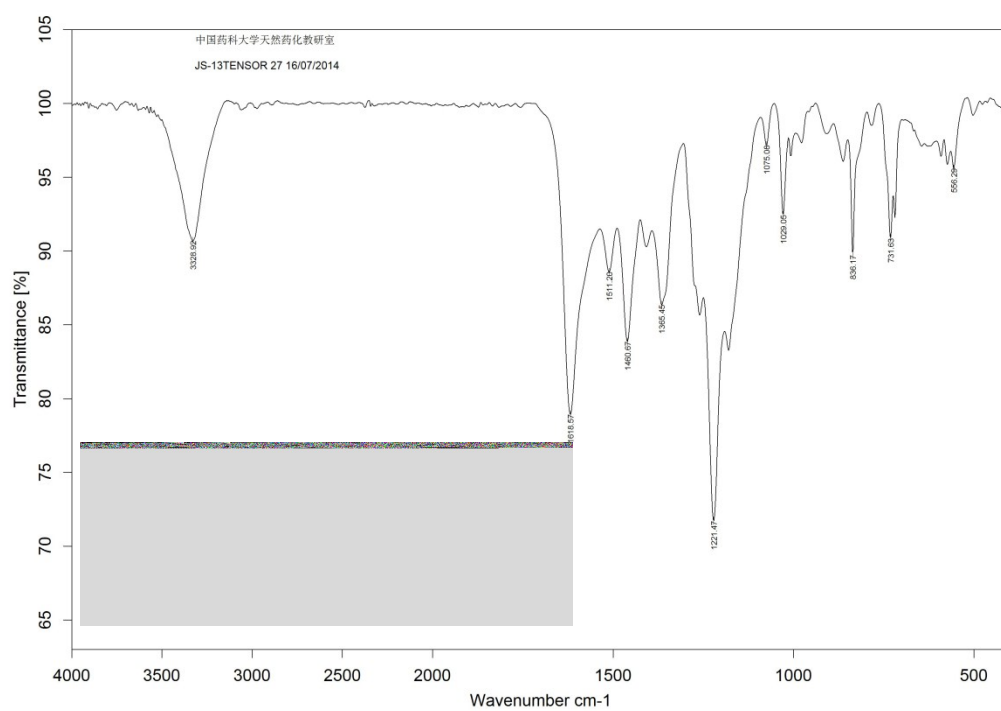

$^1\text{H}$  NMR of compound **3c** in DMSO

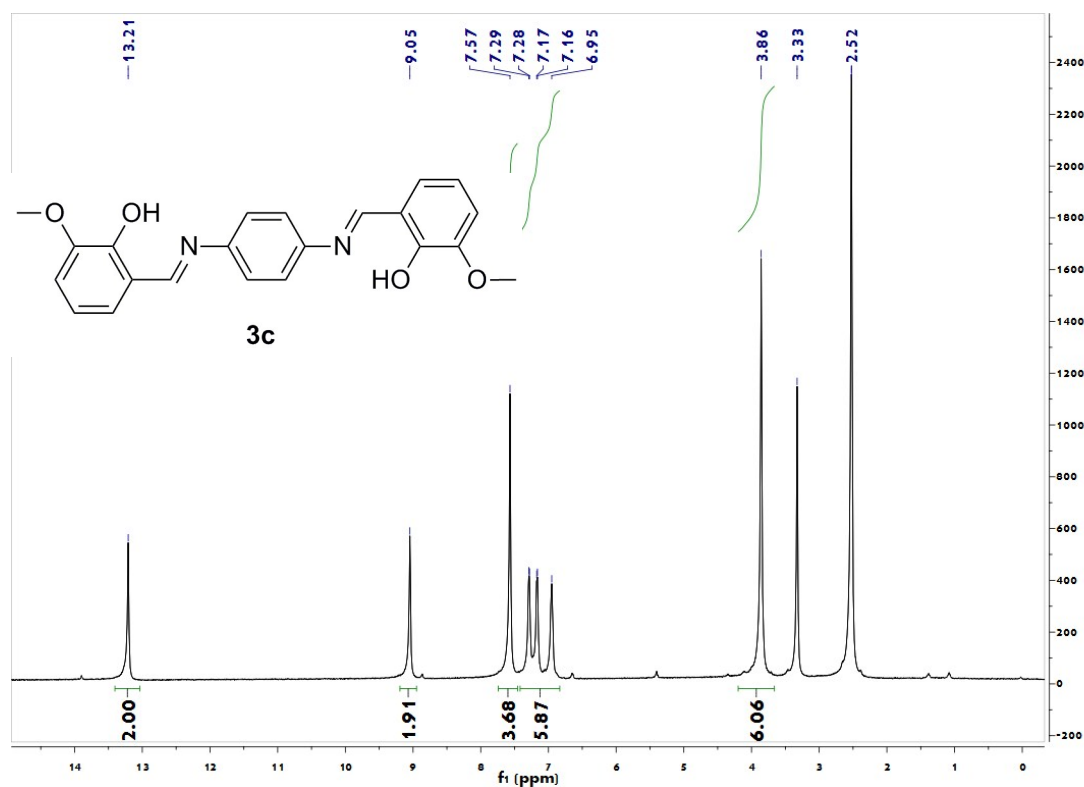

$^{13}\text{C}$  NMR spectrum of compound **3c** in DMSO

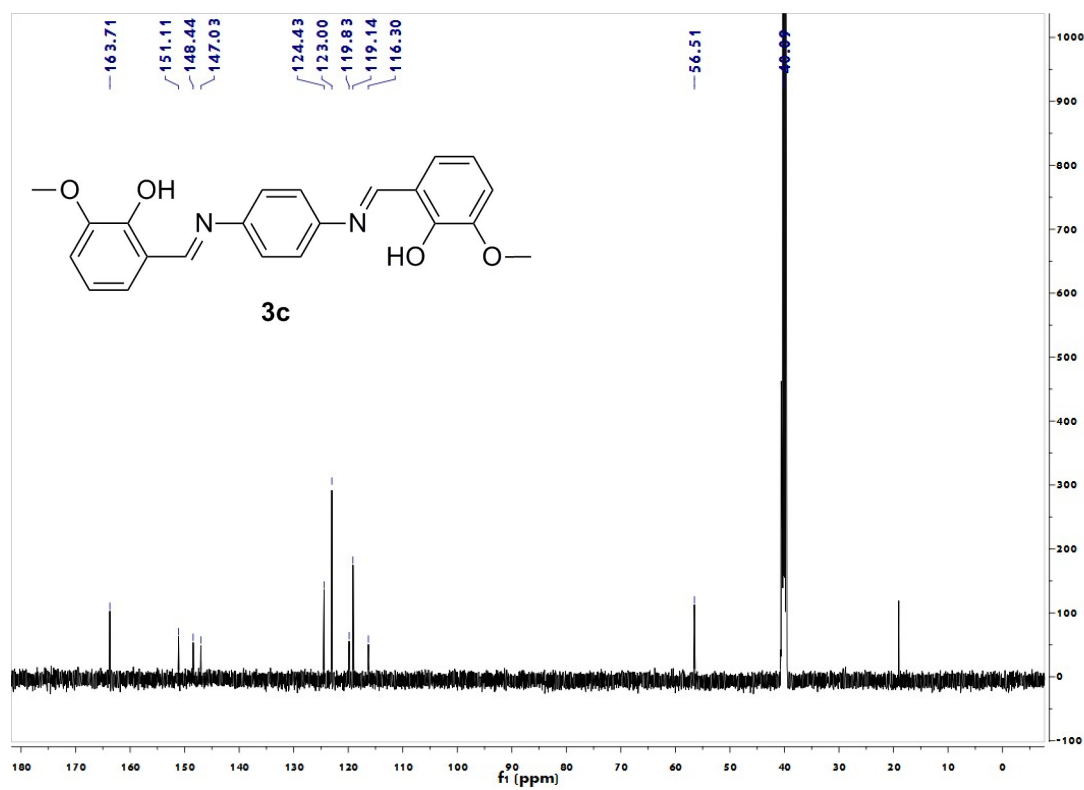

# IR of compound **3c**

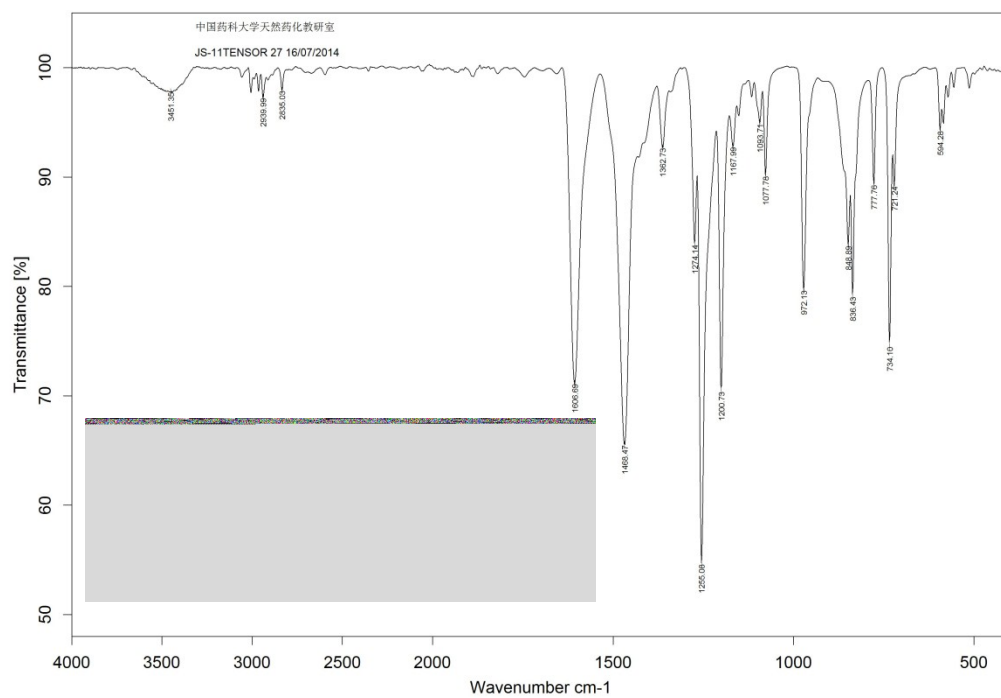

# <sup>1</sup>H NMR of compound **3d** in DMSO

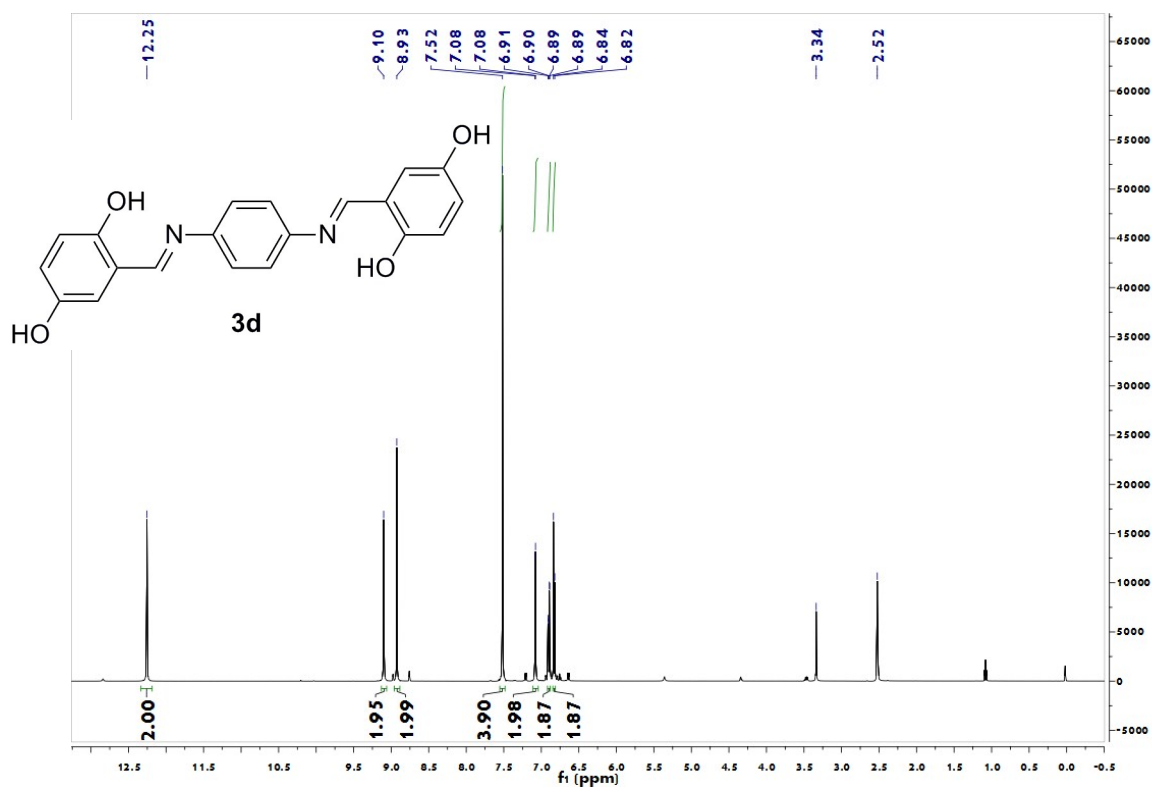

$^{13}\text{C}$  NMR of compound **3d** in DMSO

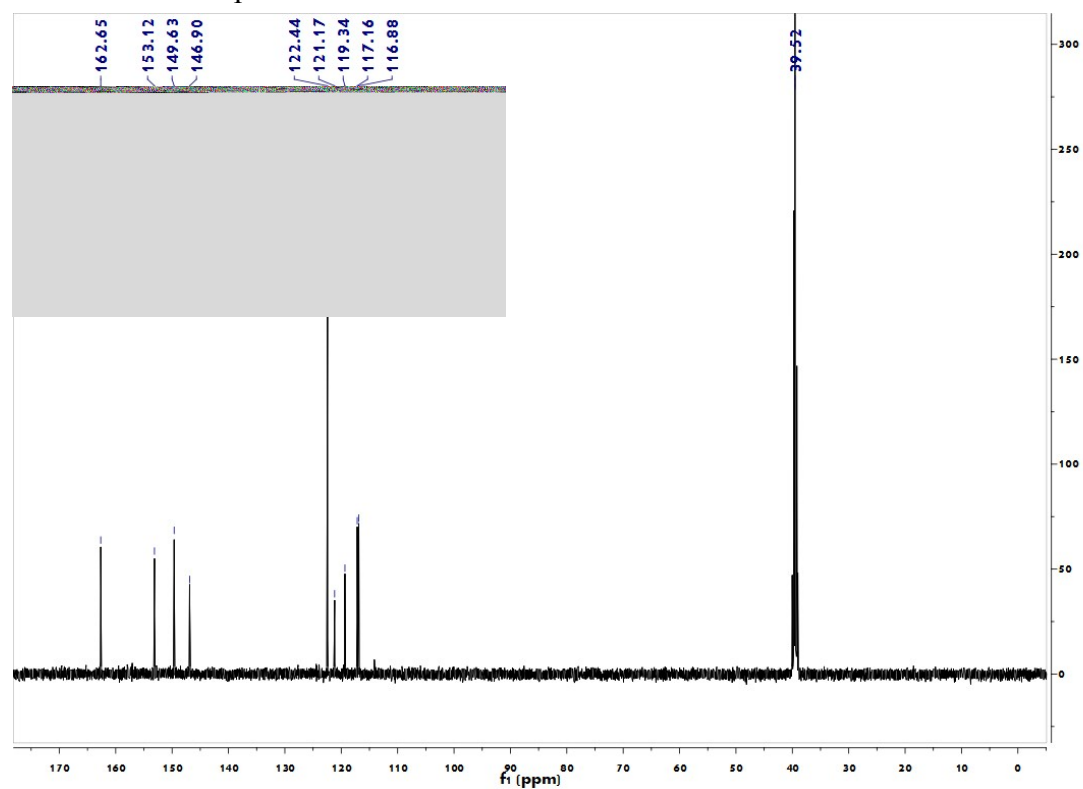

IR of compound **3d**

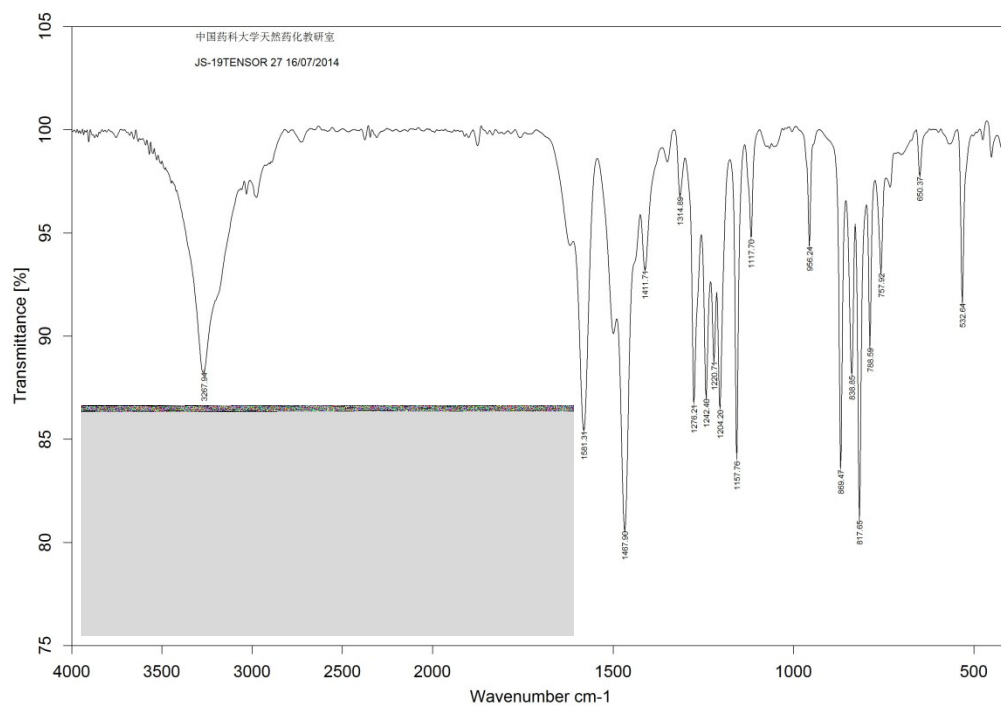



$^1\text{H}$  NMR of compound **3e** in DMSO

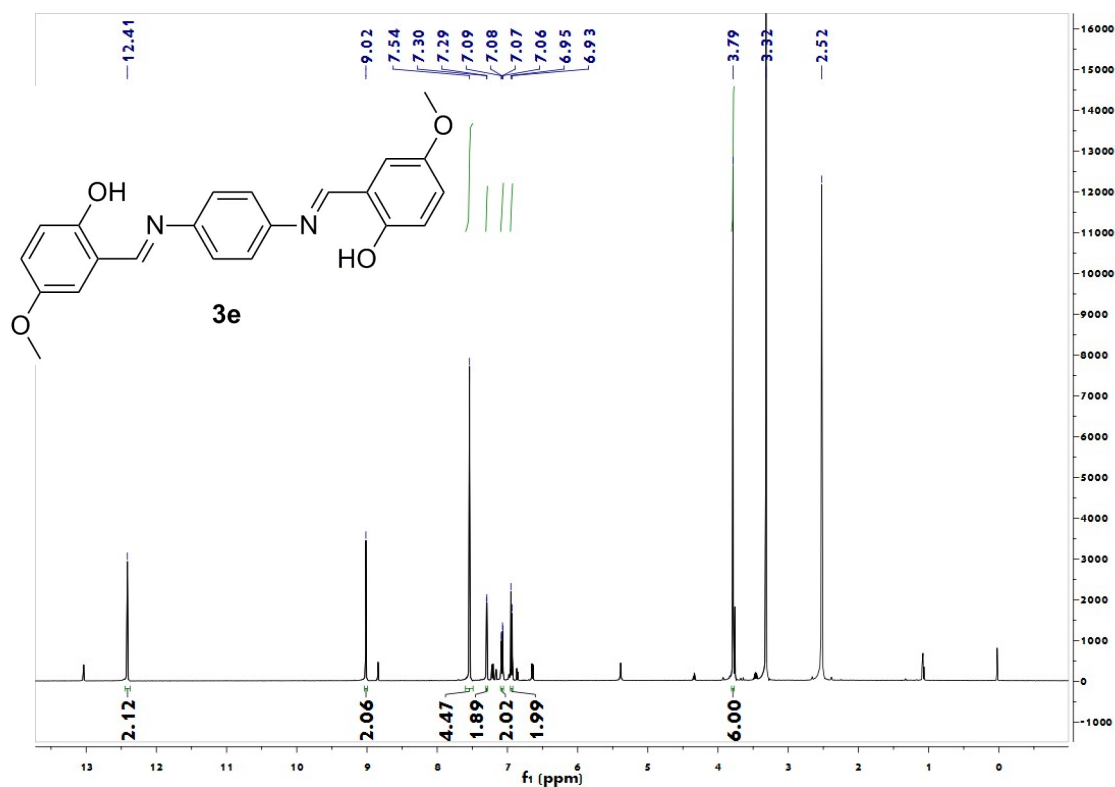

$^{13}\text{C}$  NMR spectrum of compound **3e** in DMSO

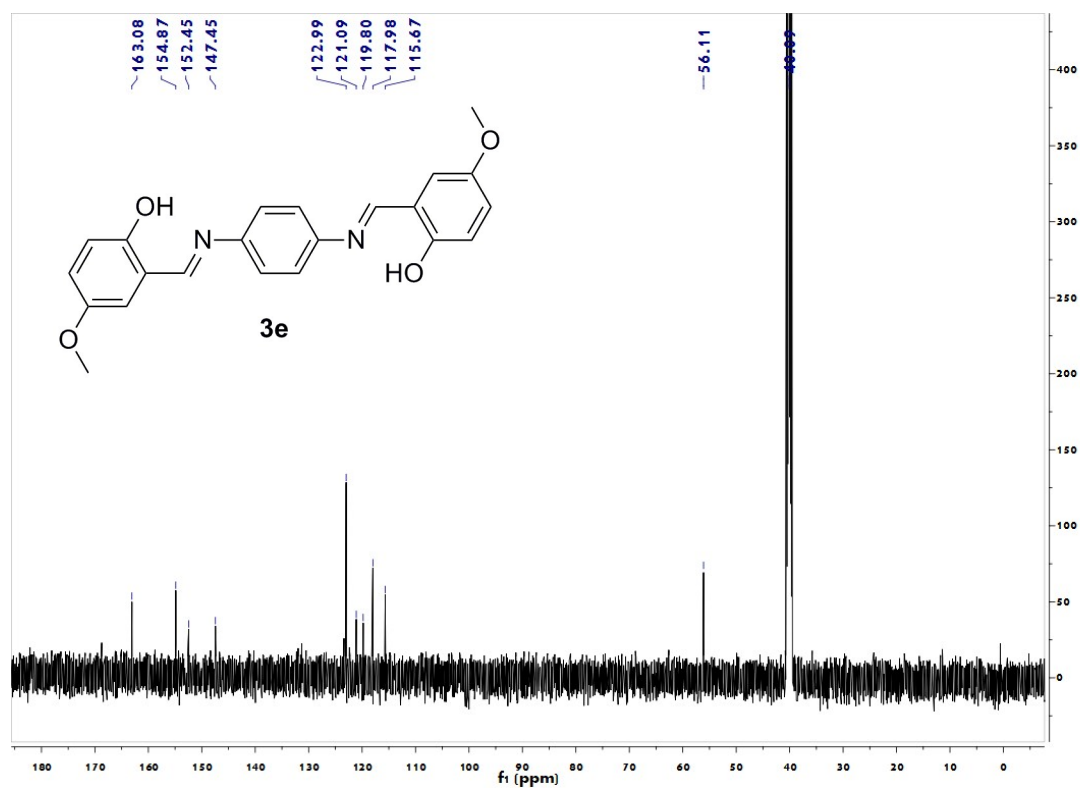

# IR of compound **3e**

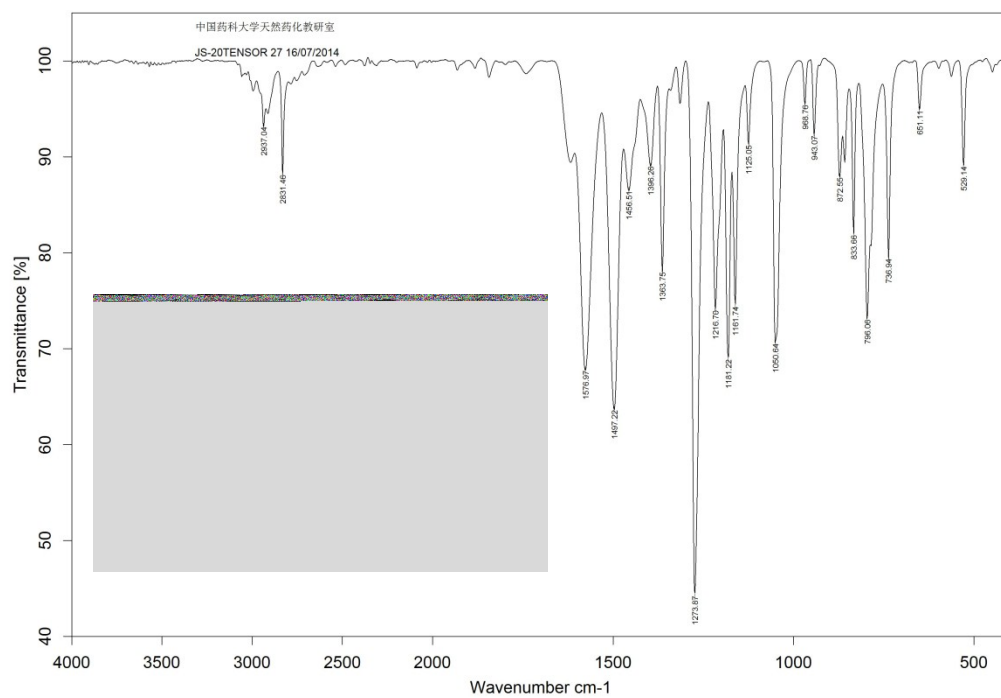

# <sup>1</sup>H NMR of compound **3f** in DMSO

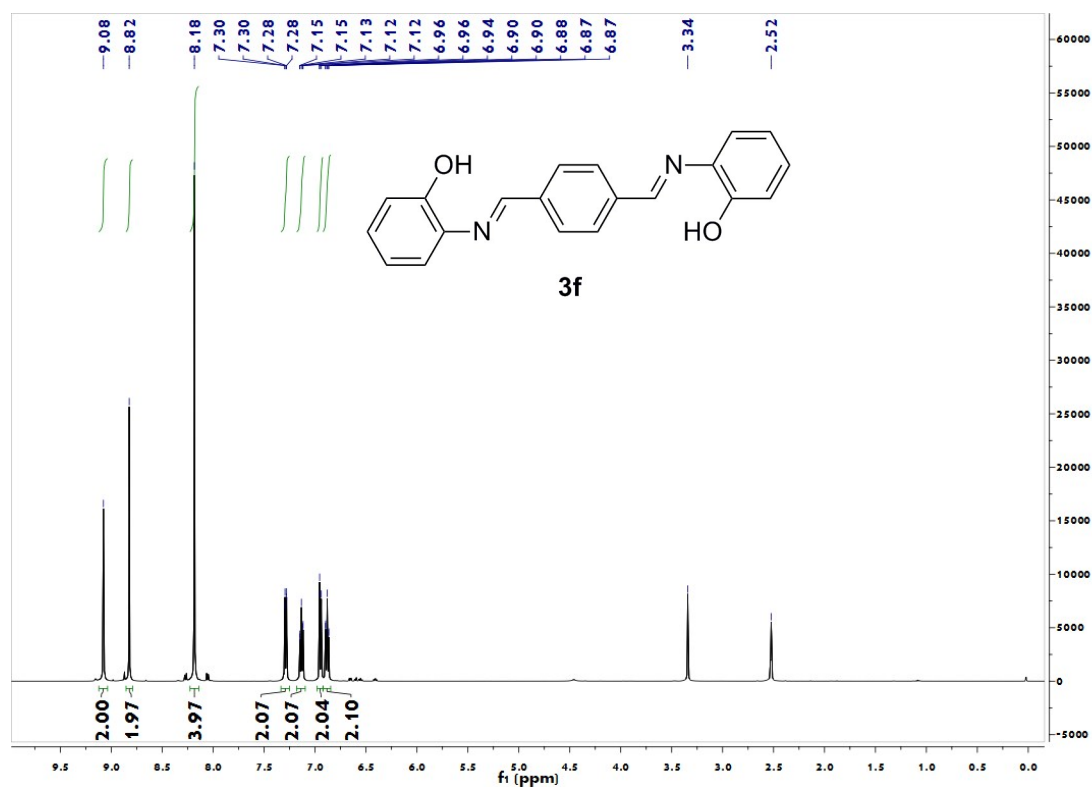

$^{13}\text{C}$  NMR of compound **3f** in DMSO

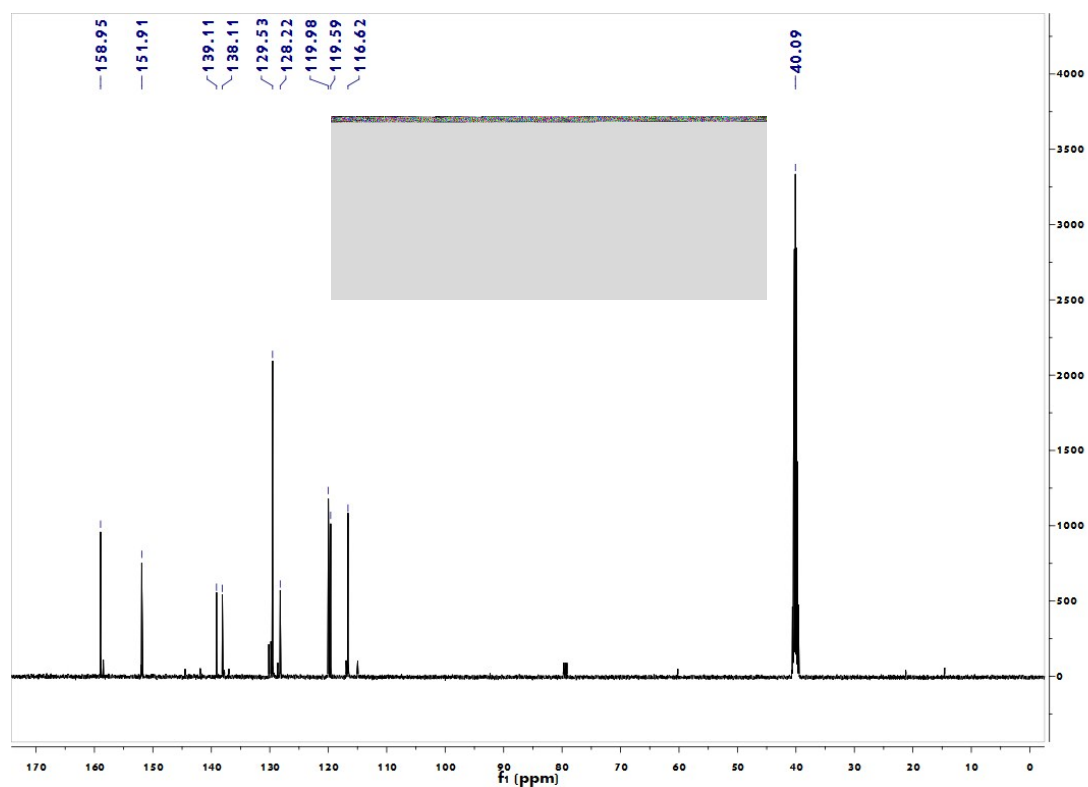

IR of compound **3f**

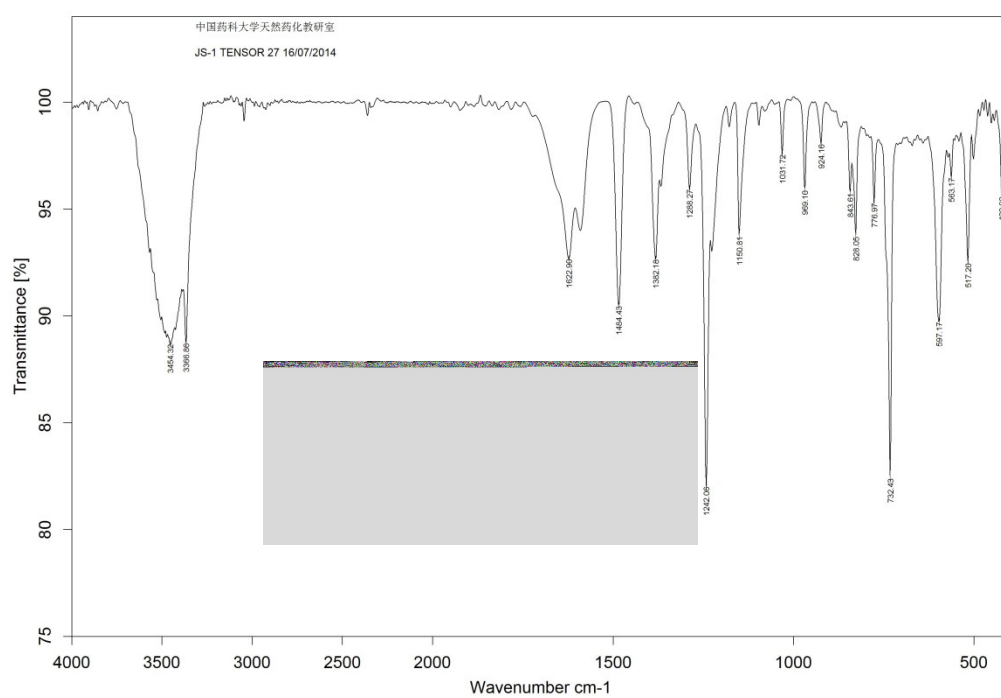

$^1\text{H}$  NMR of compound **3g** in DMSO

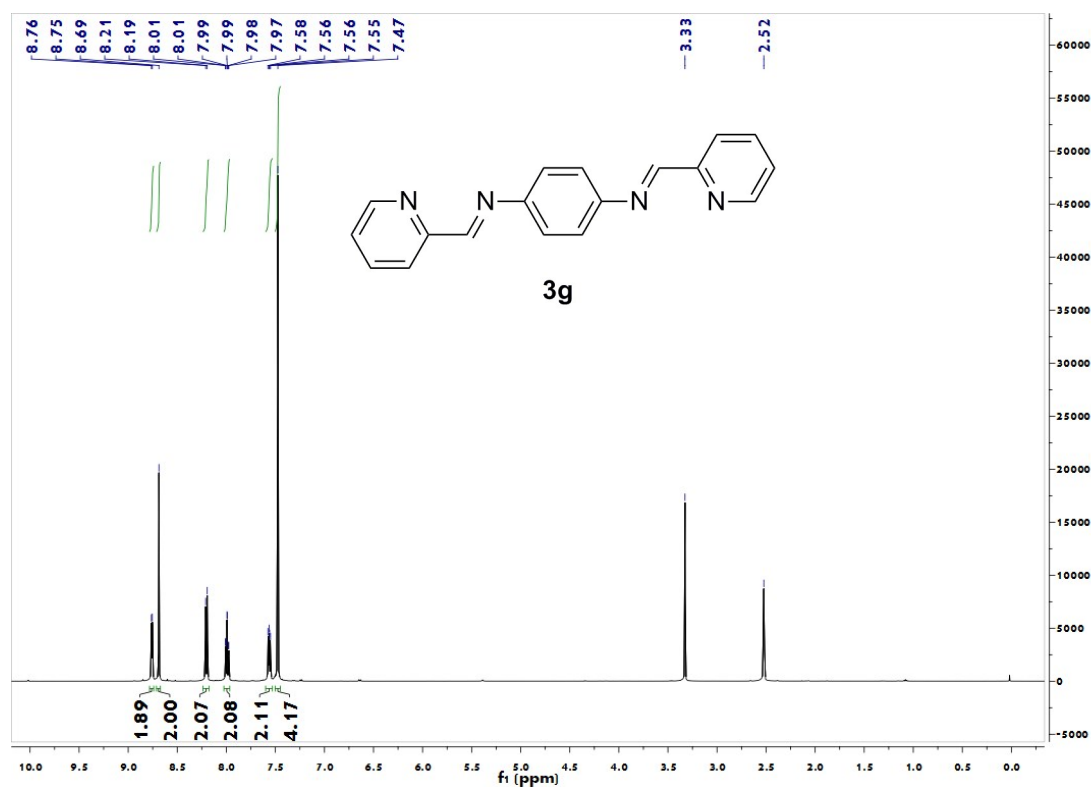

$^{13}\text{C}$  NMR of compound **3g** in DMSO

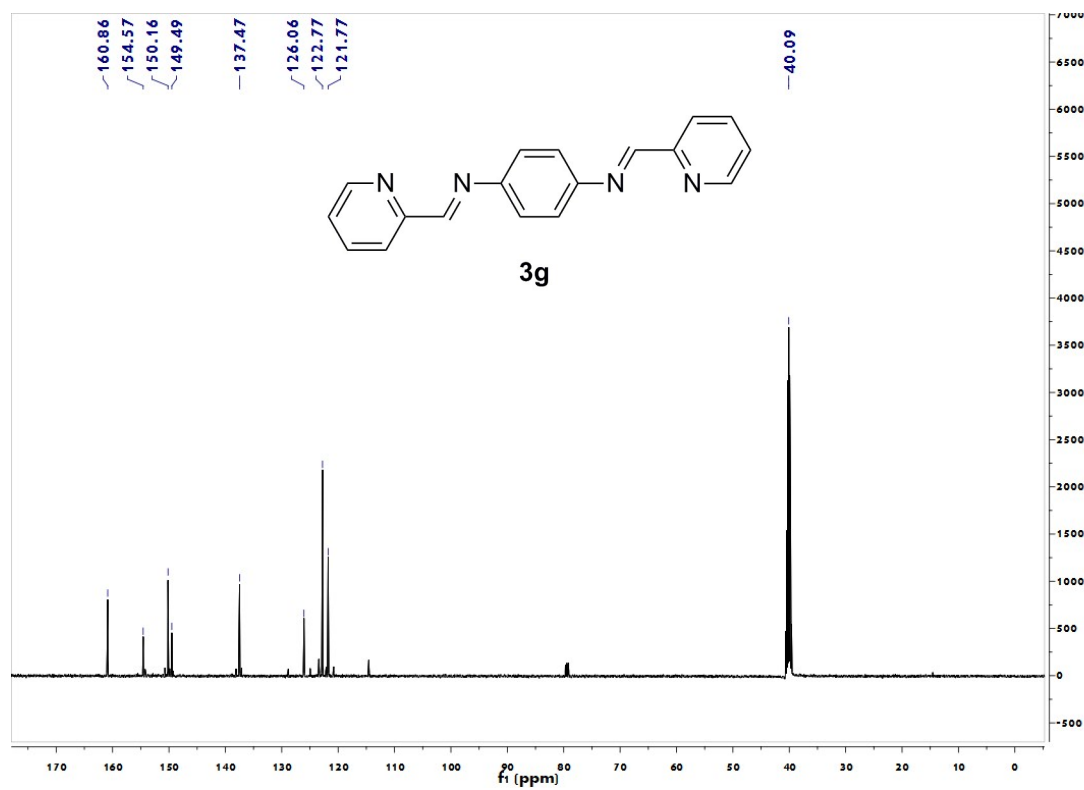

## IR of compound **3g**

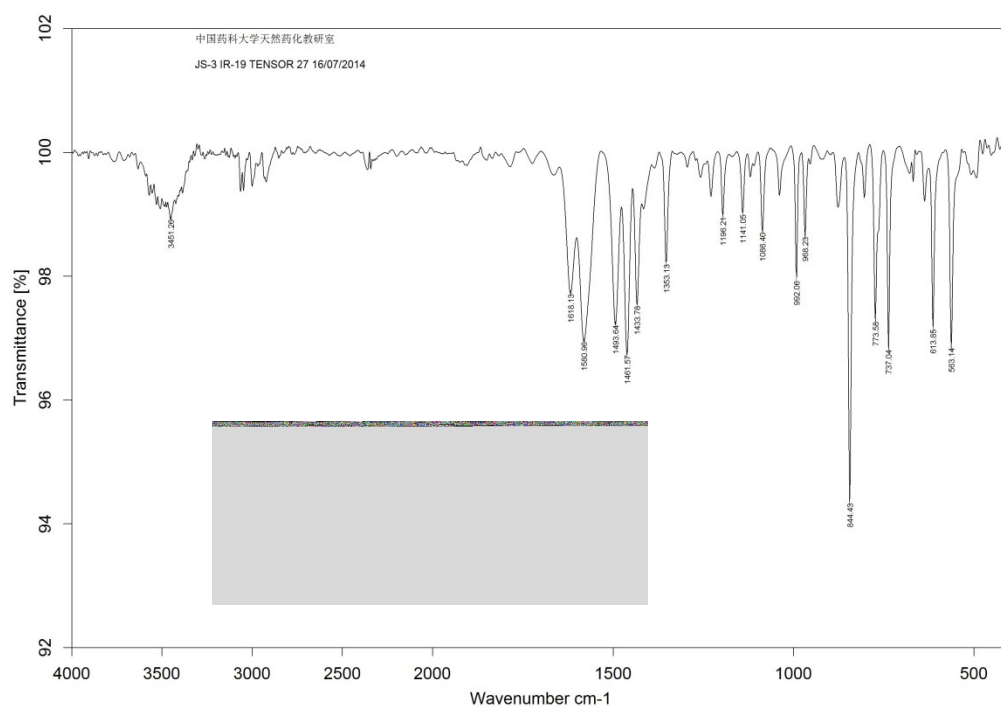

## <sup>1</sup>H NMR of compound **5a** in DMSO

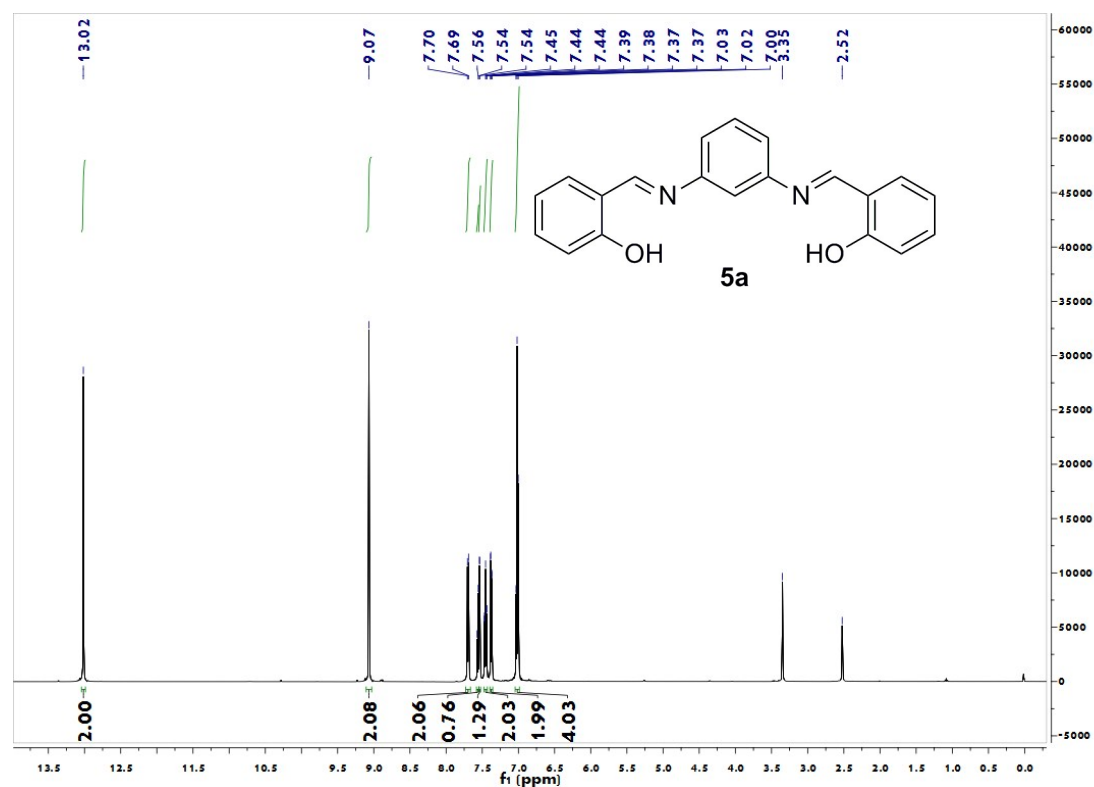

$^{13}\text{C}$  NMR of compound **5a** in DMSO

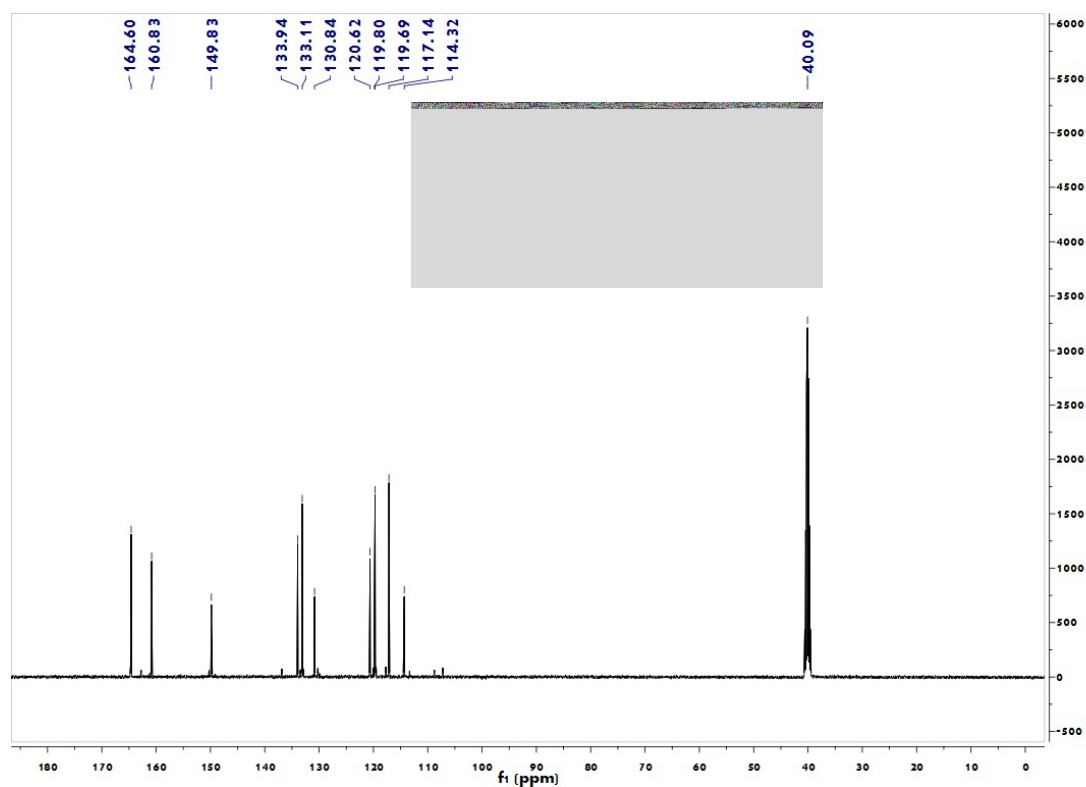

IR of compound **5a**

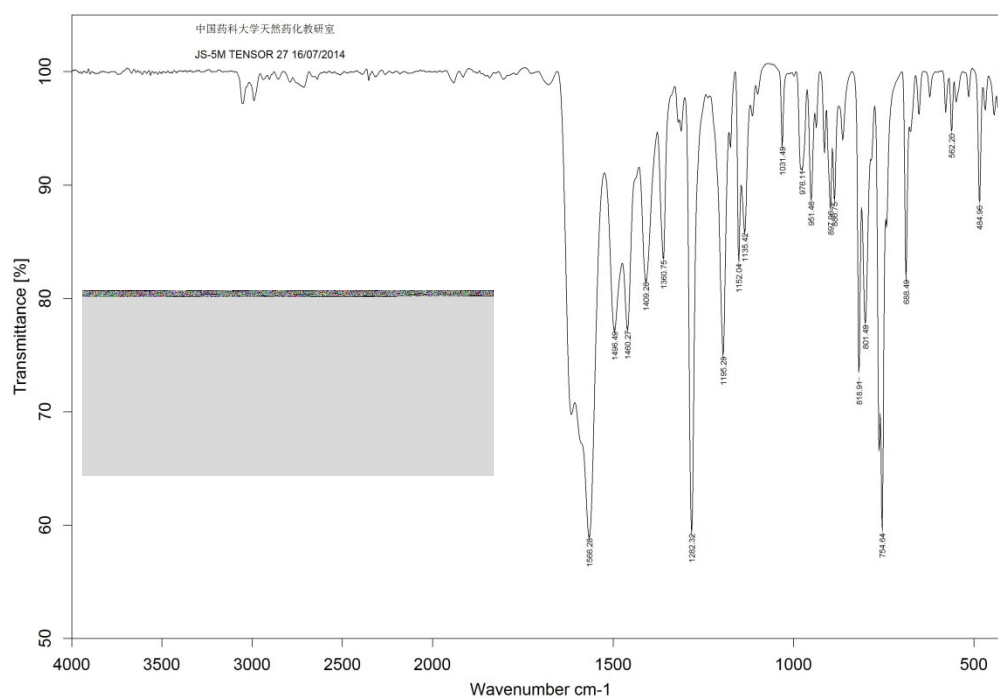

$^1\text{H}$  NMR of compound **5b** in DMSO

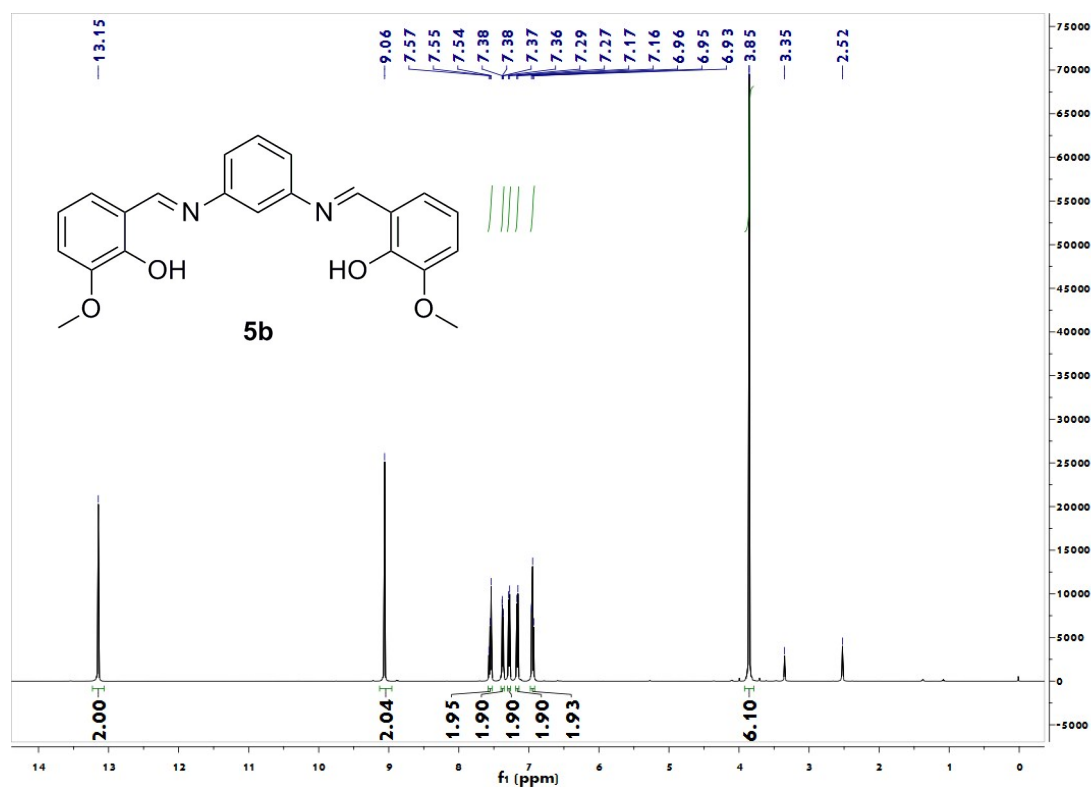

$^{13}\text{C}$  NMR of compound **5b** in DMSO

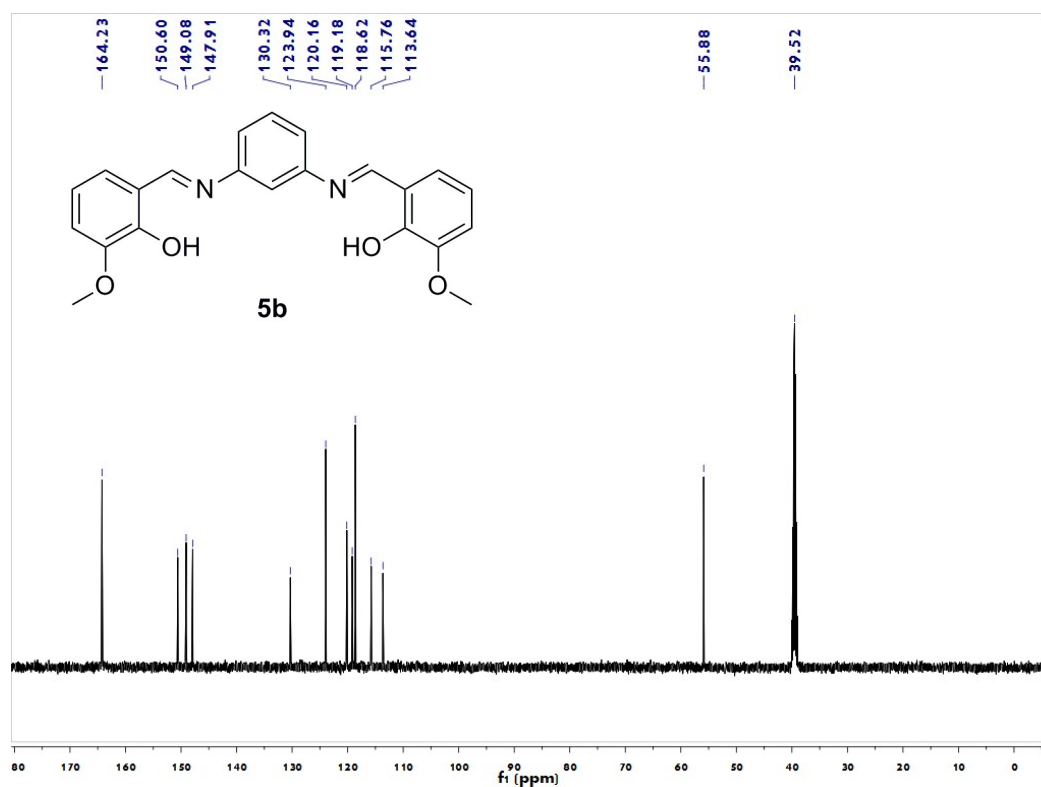

## IR of compound **5b**

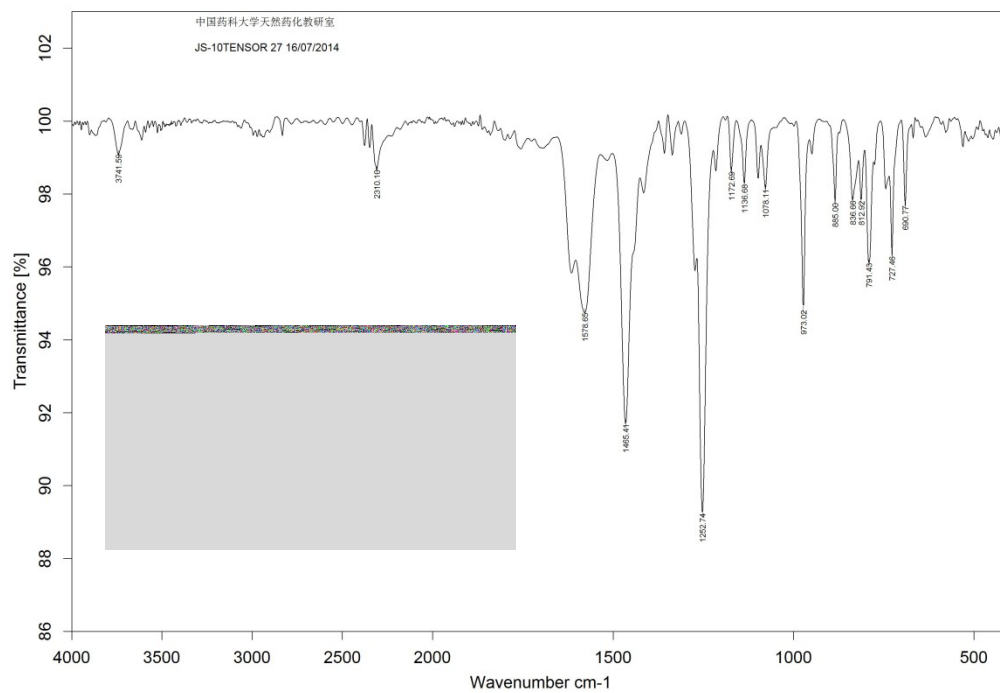

## $^1\text{H}$ NMR of compound **5c** in DMSO

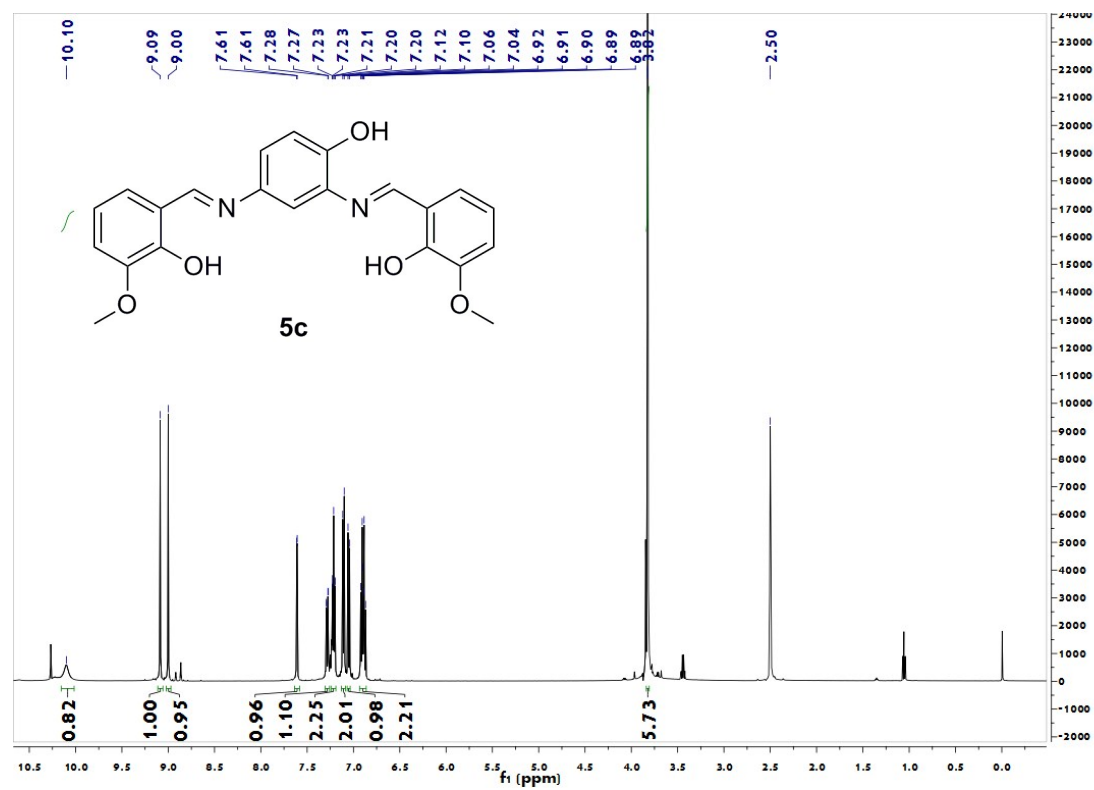



$^{13}\text{C}$  NMR of compound **5c** in DMSO

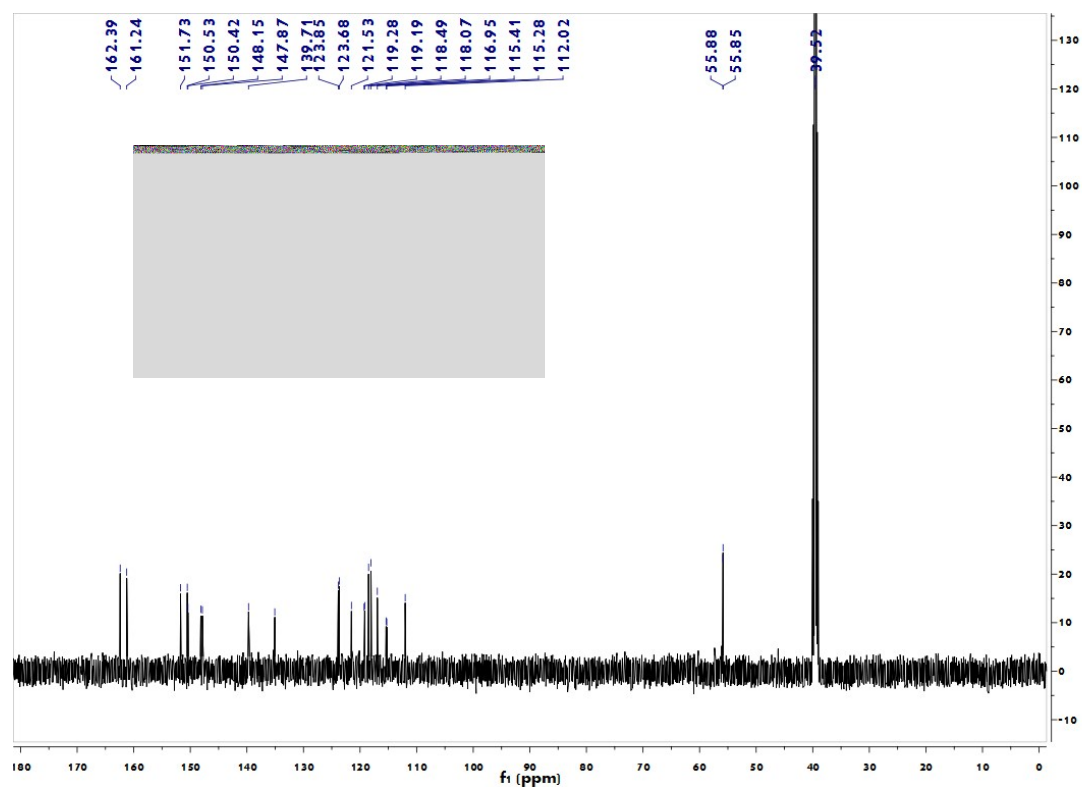

IR of compound **5c**

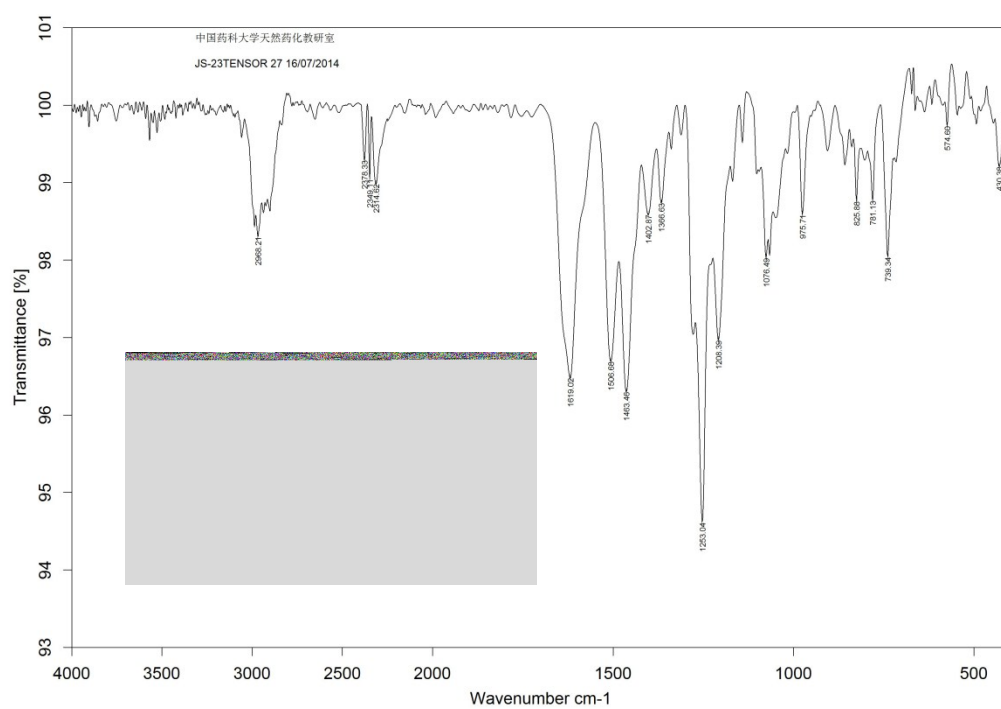

$^1\text{H}$  NMR of compound **5d** in DMSO

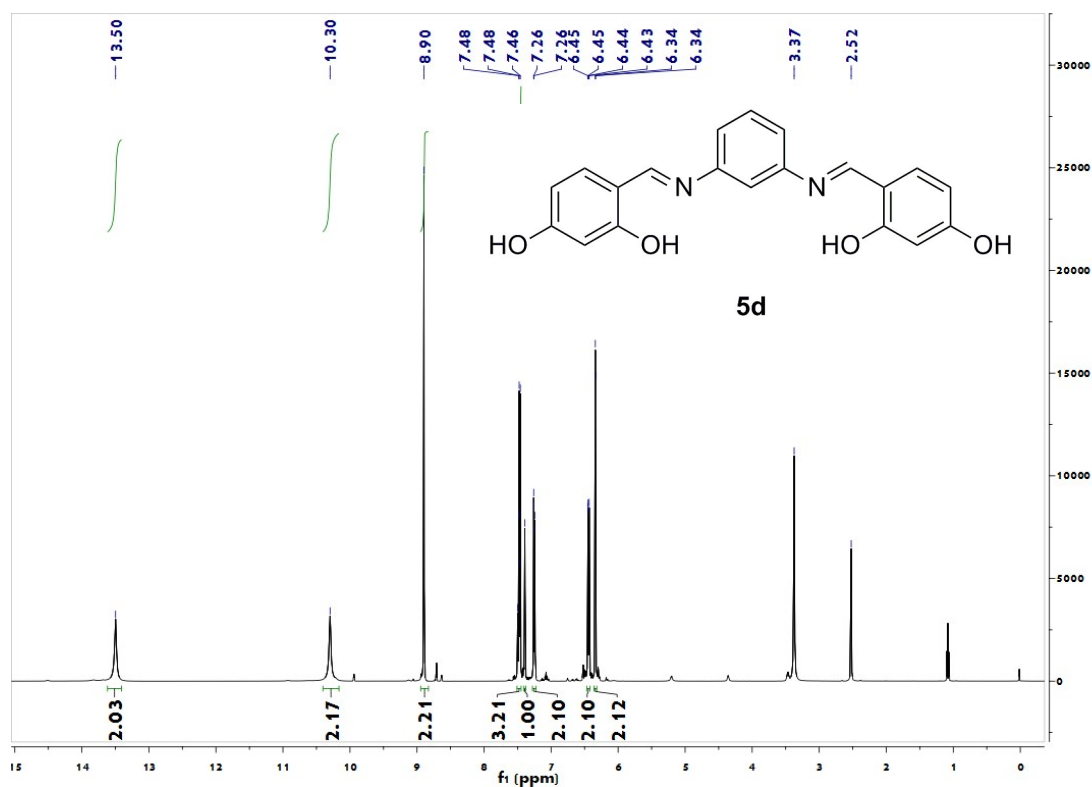

$^{13}\text{C}$  NMR of compound **5d** in DMSO

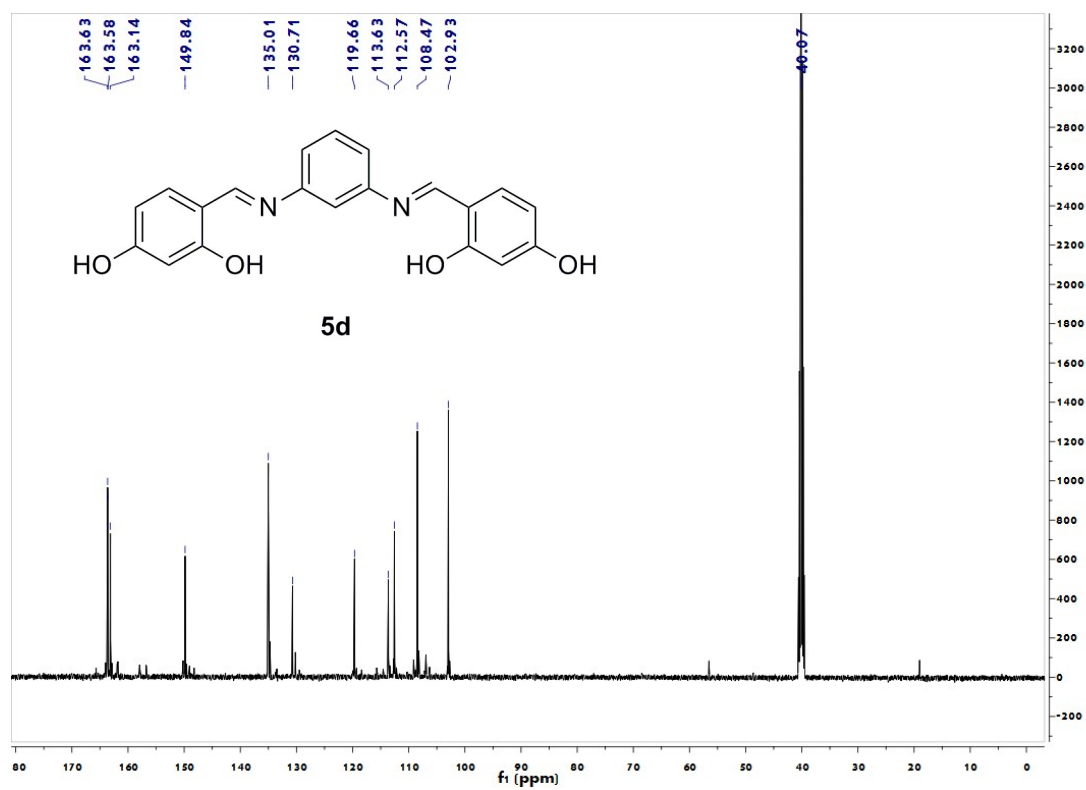

## IR of compound **5d**

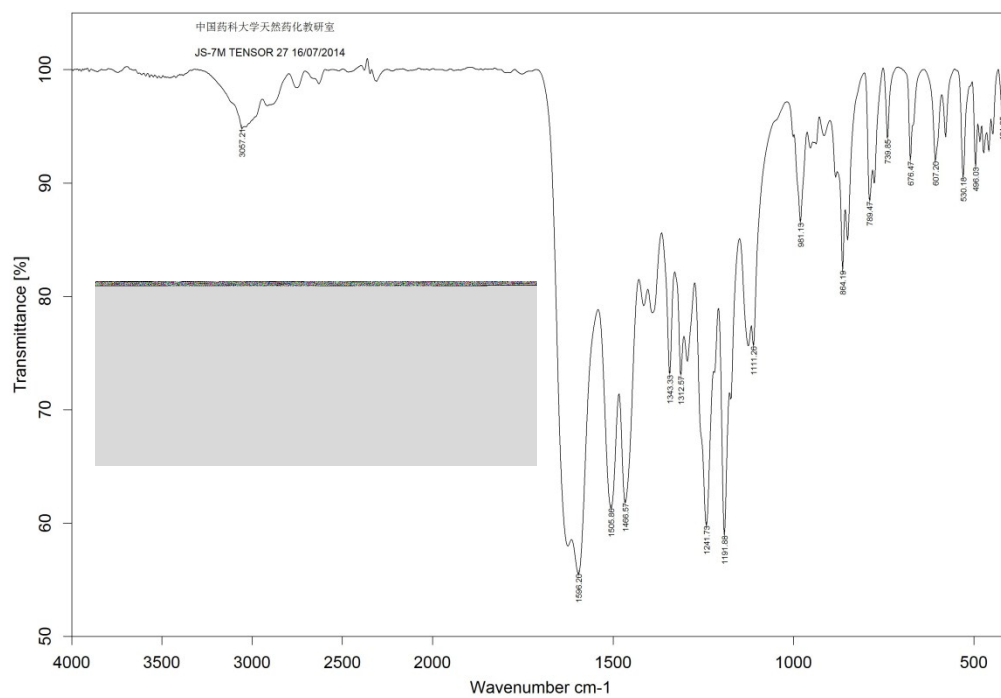

## <sup>1</sup>H NMR of compound **5e** in DMSO

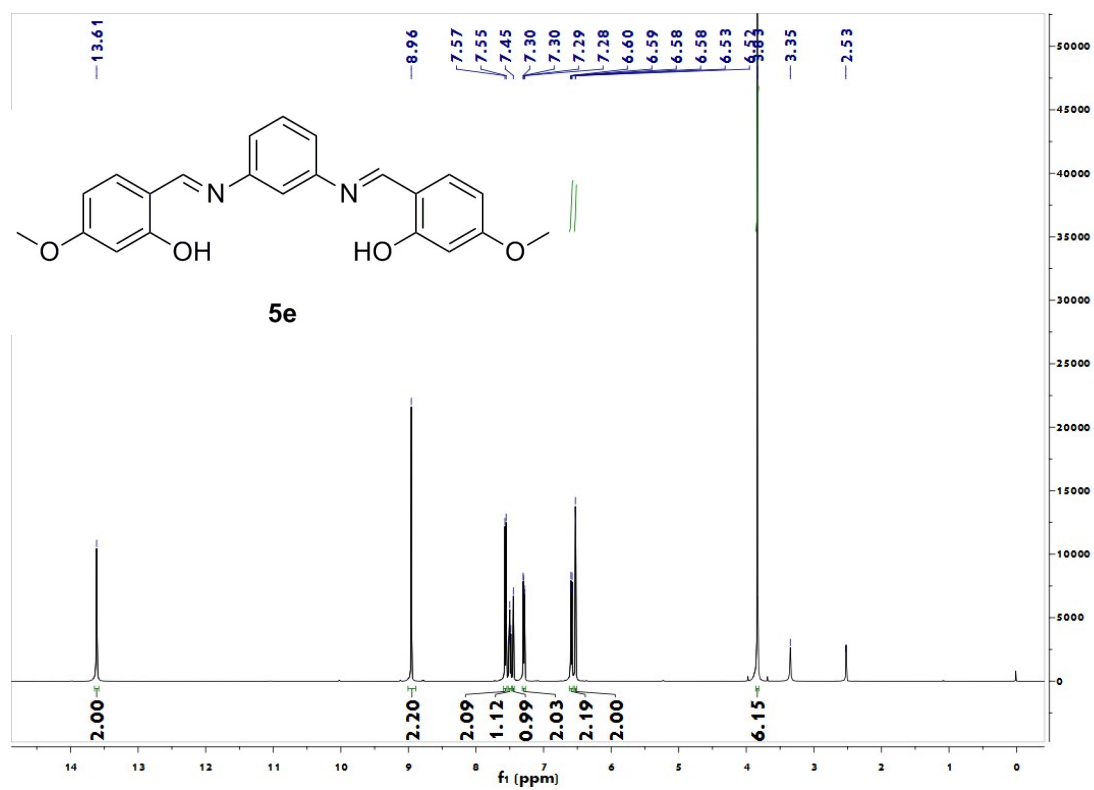

# $^{13}\text{C}$ NMR of compound **5e** in DMSO

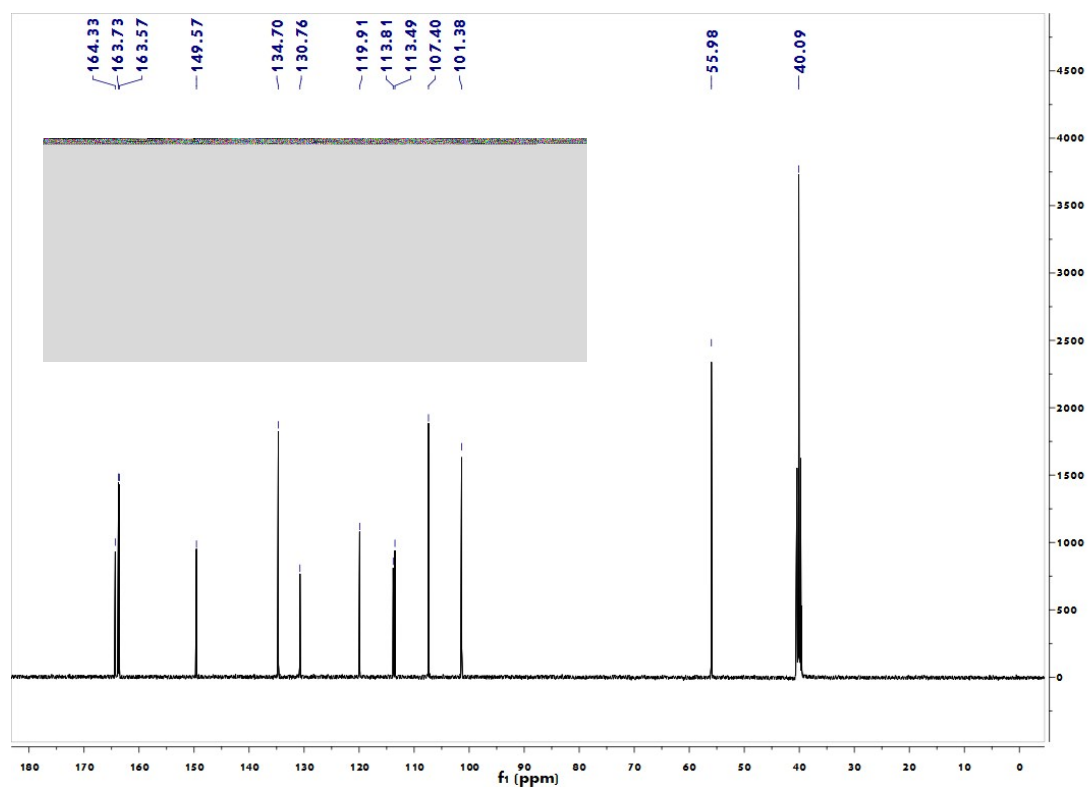

# IR of compound **5e**

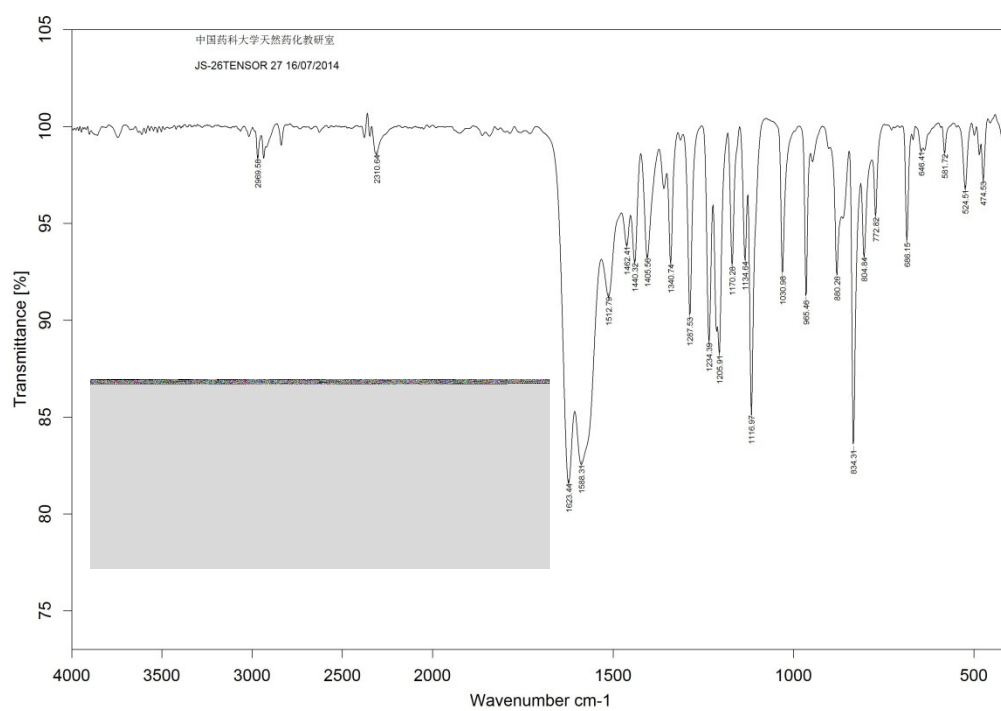

$^1\text{H}$  NMR of compound **5f** in DMSO

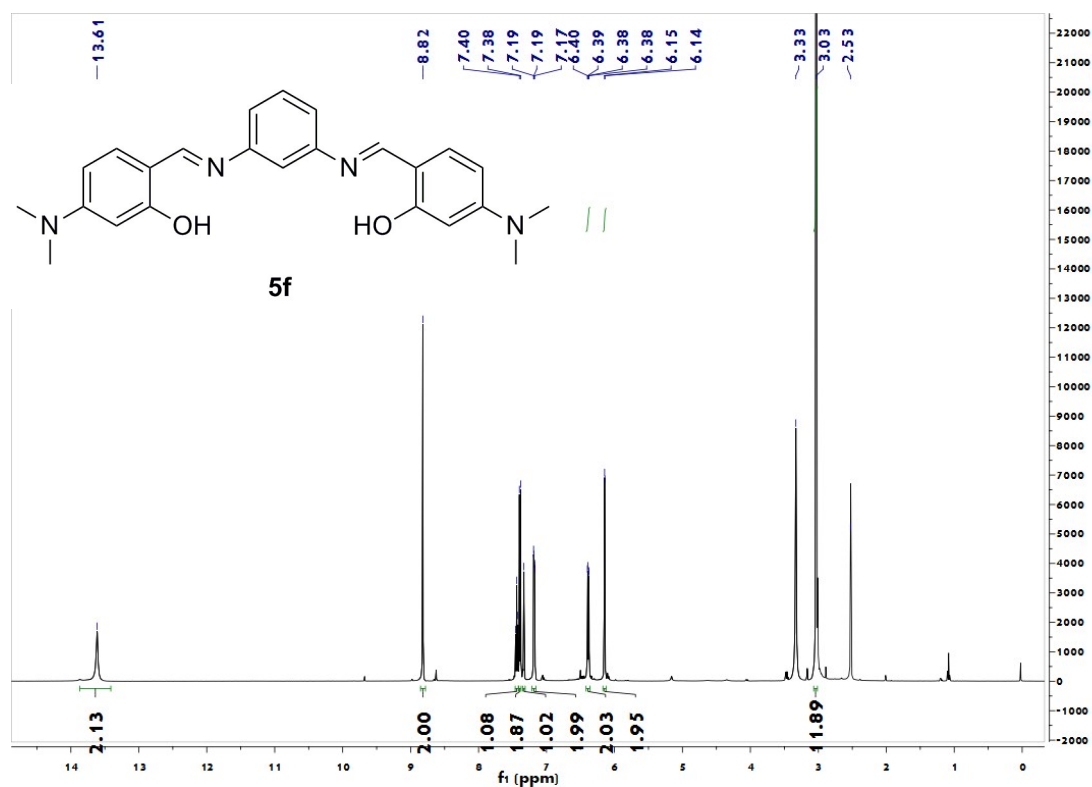

$^{13}\text{C}$  NMR of compound **5f** in DMSO

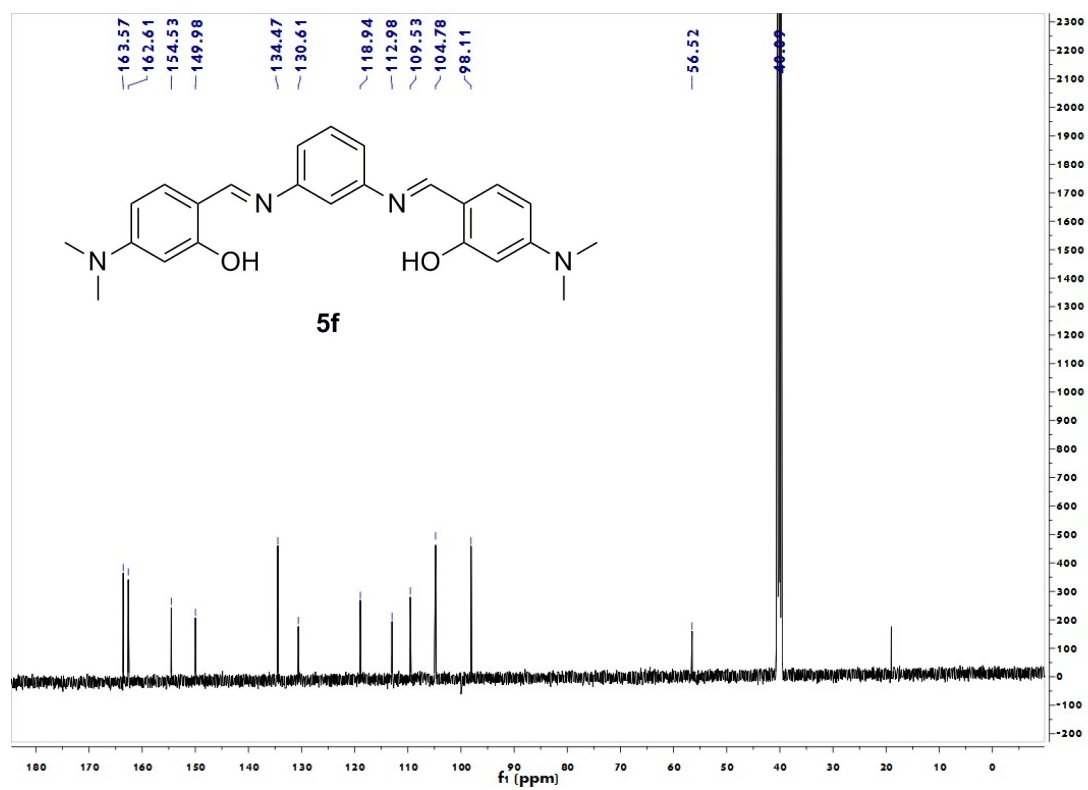

## IR of compound **5f**

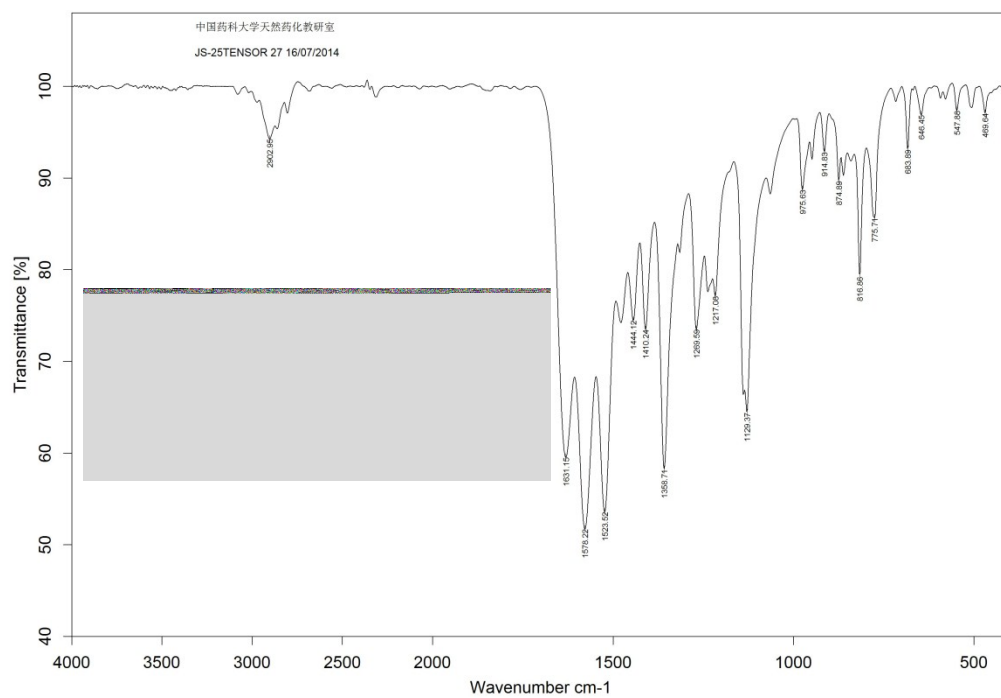

## <sup>1</sup>H NMR of compound **5g** in DMSO

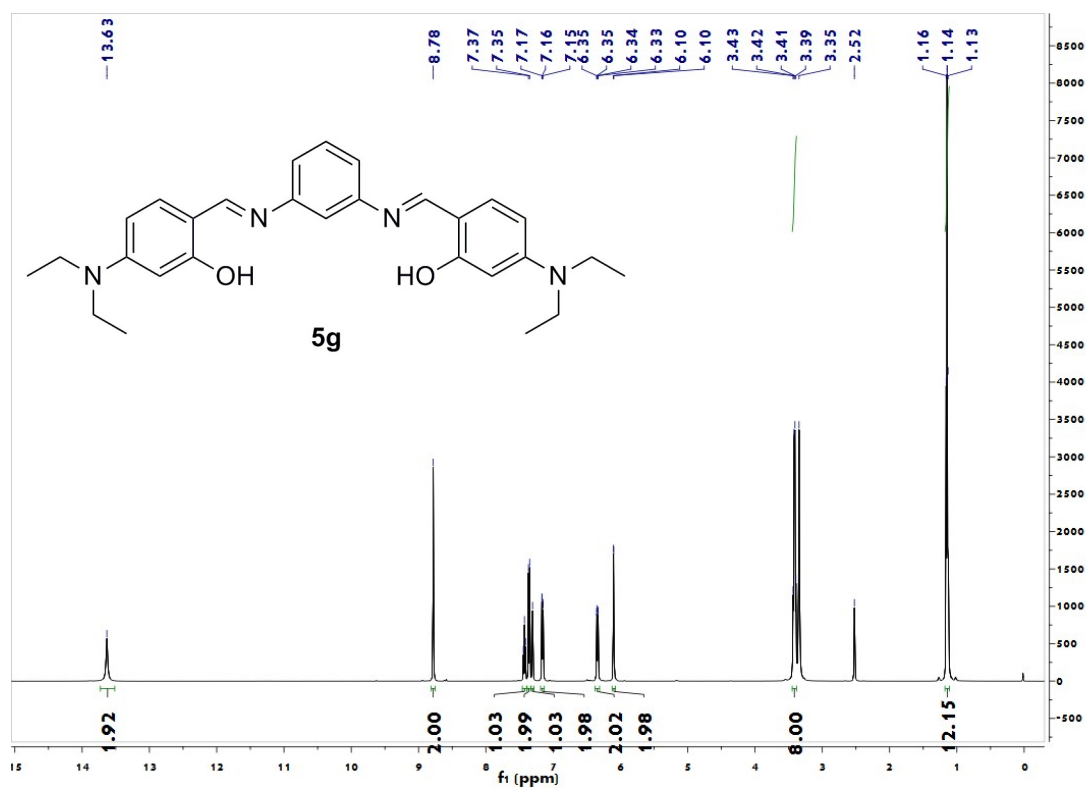

$^{13}\text{C}$  NMR of compound **5g** in DMSO

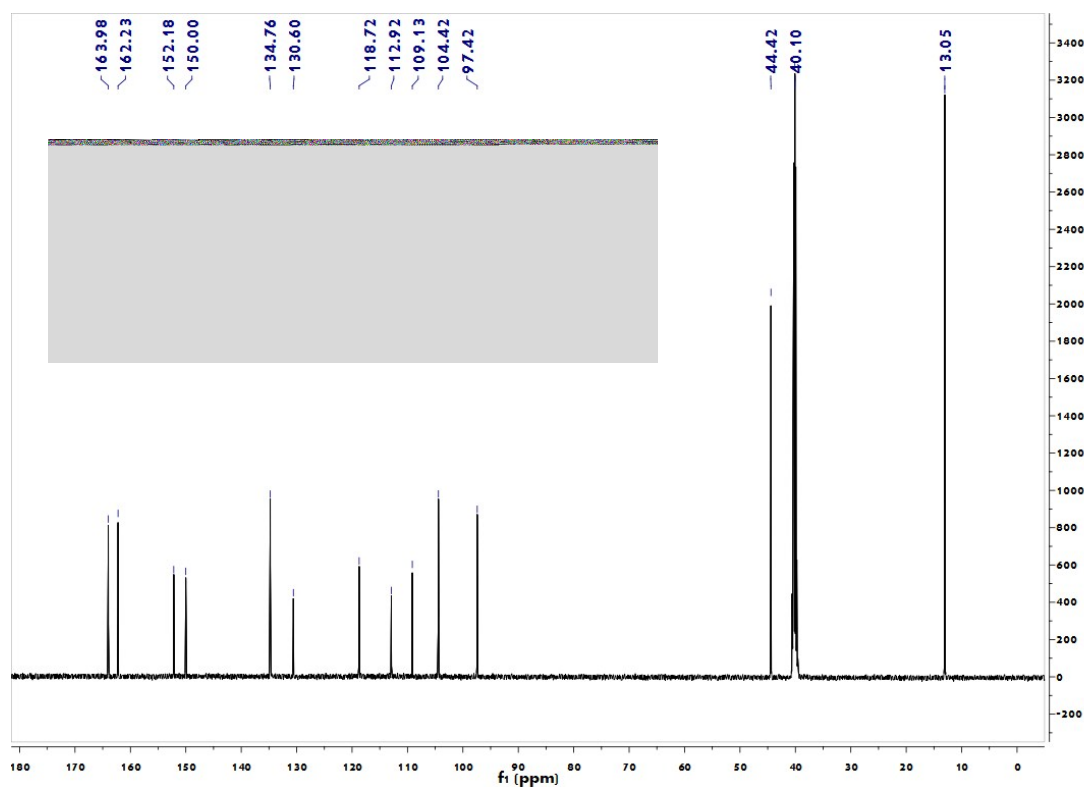

IR of compound **5g**

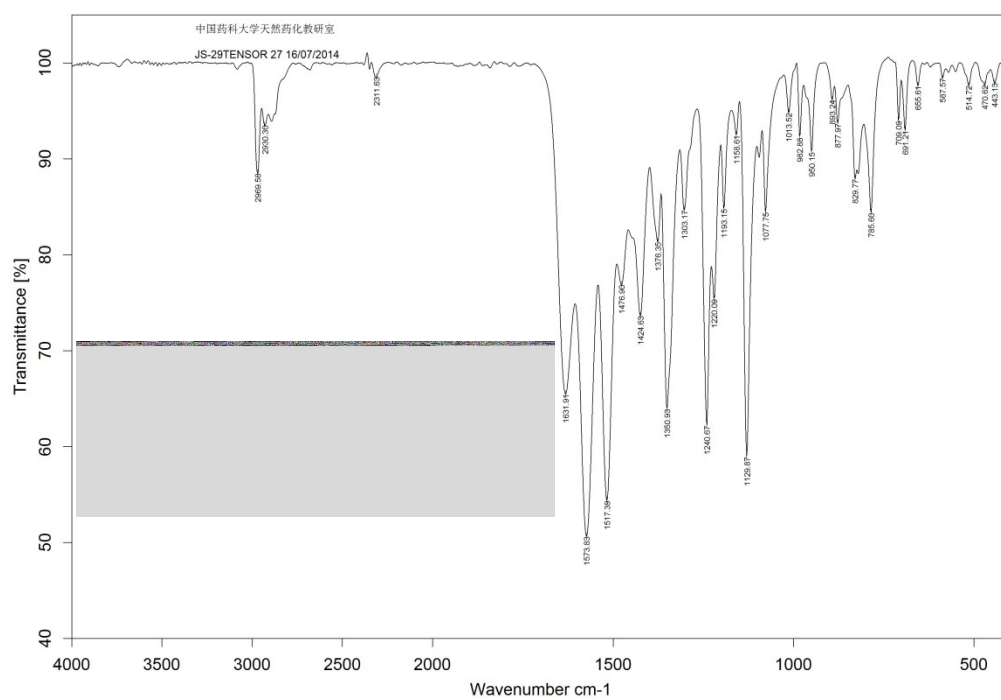

$^1\text{H}$  NMR of compound **5h** in DMSO

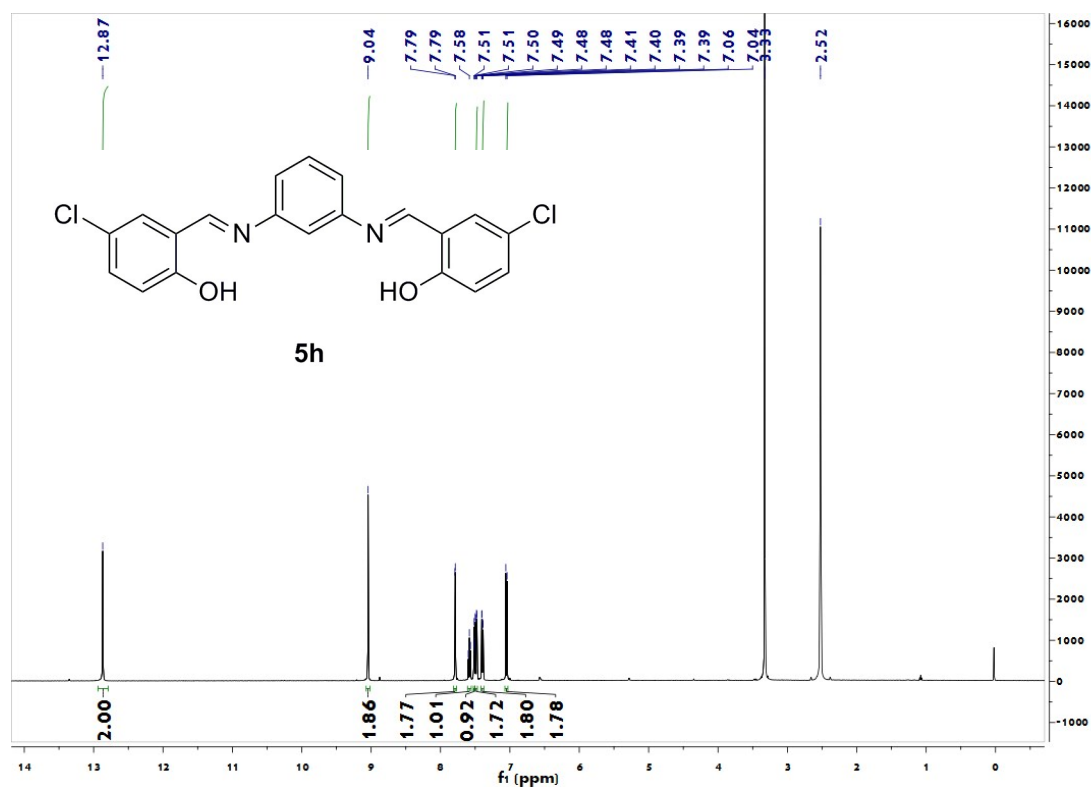

$^{13}\text{C}$  NMR of compound **5h** in DMSO

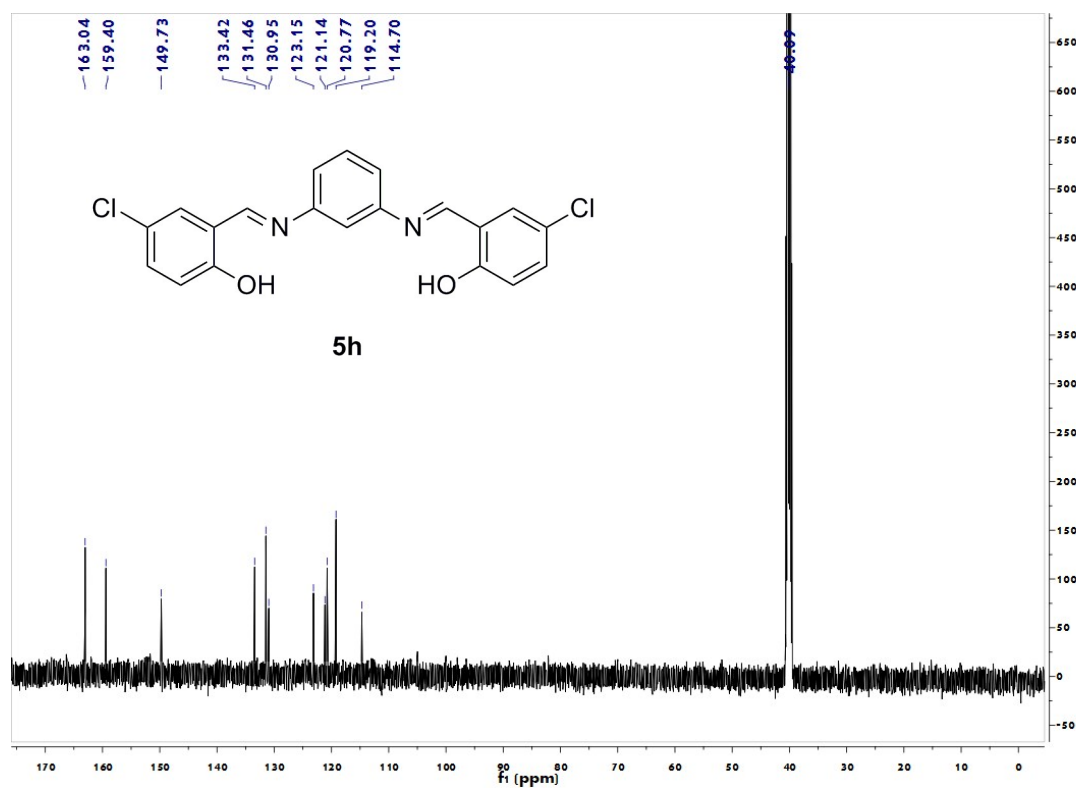



## IR of compound **5h**

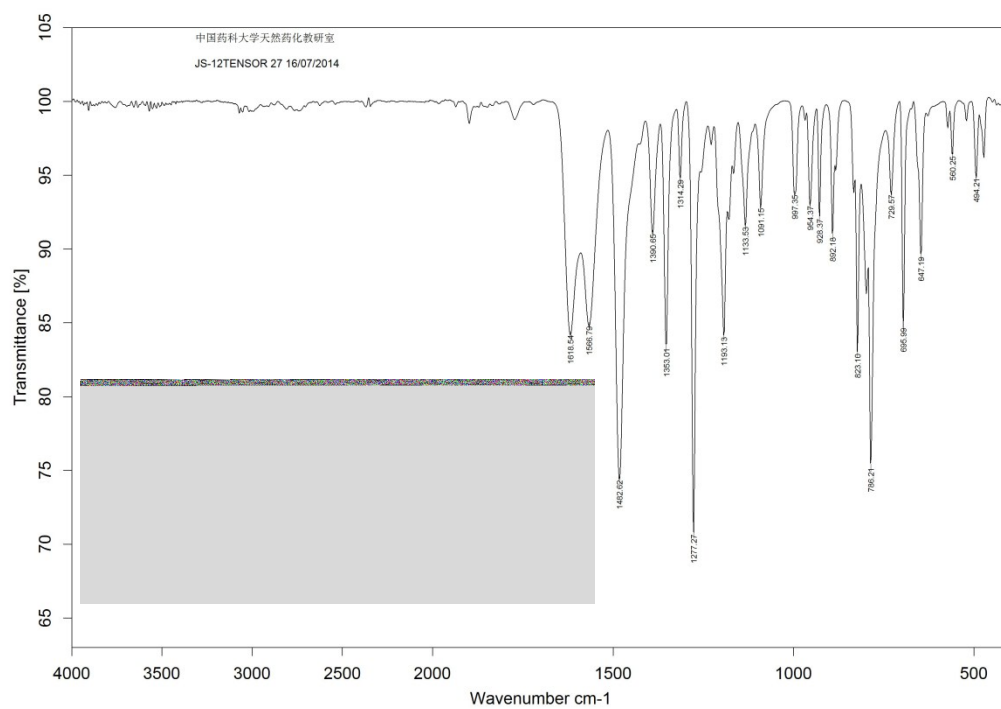

## <sup>1</sup>H NMR of compound **5i** in DMSO

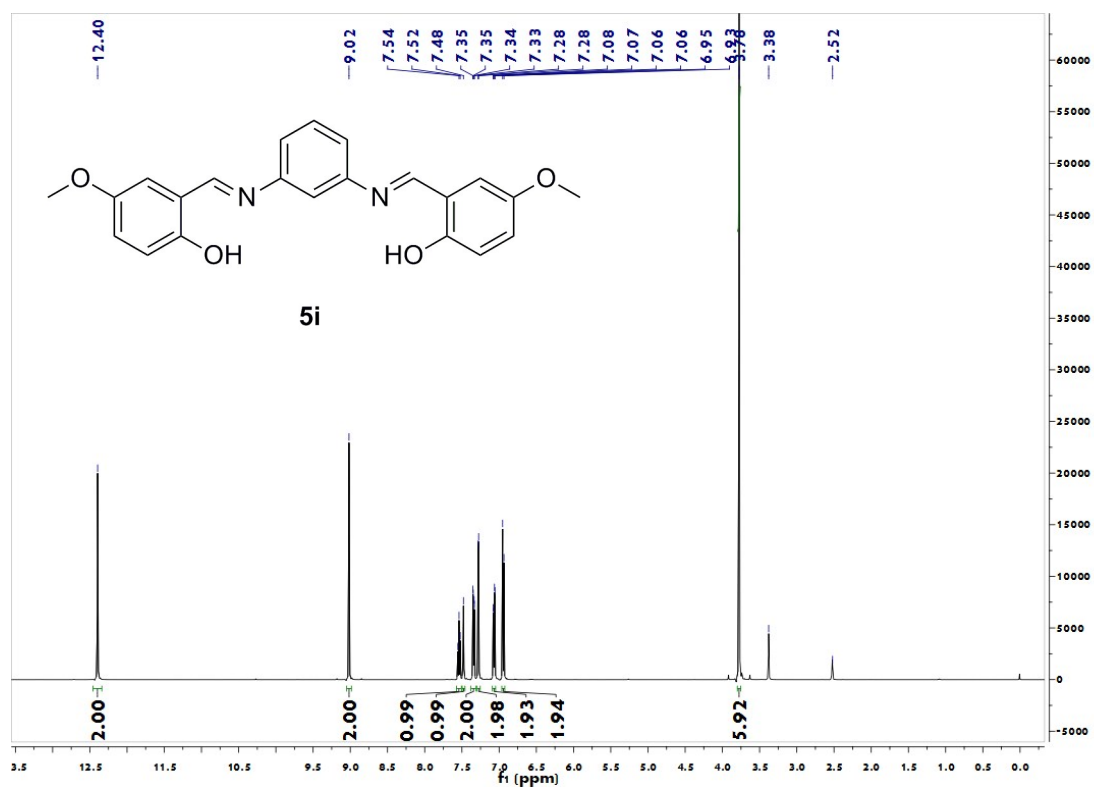

$^{13}\text{C}$  NMR of compound **5i** in DMSO

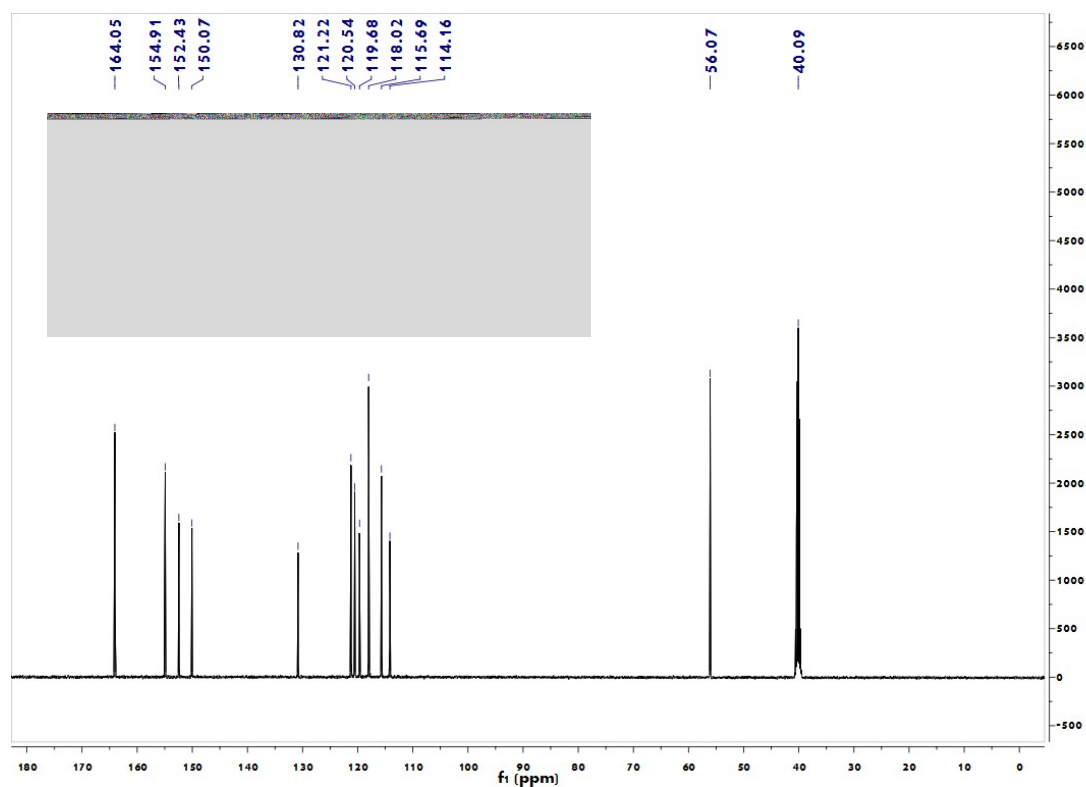

IR of compound **5i**

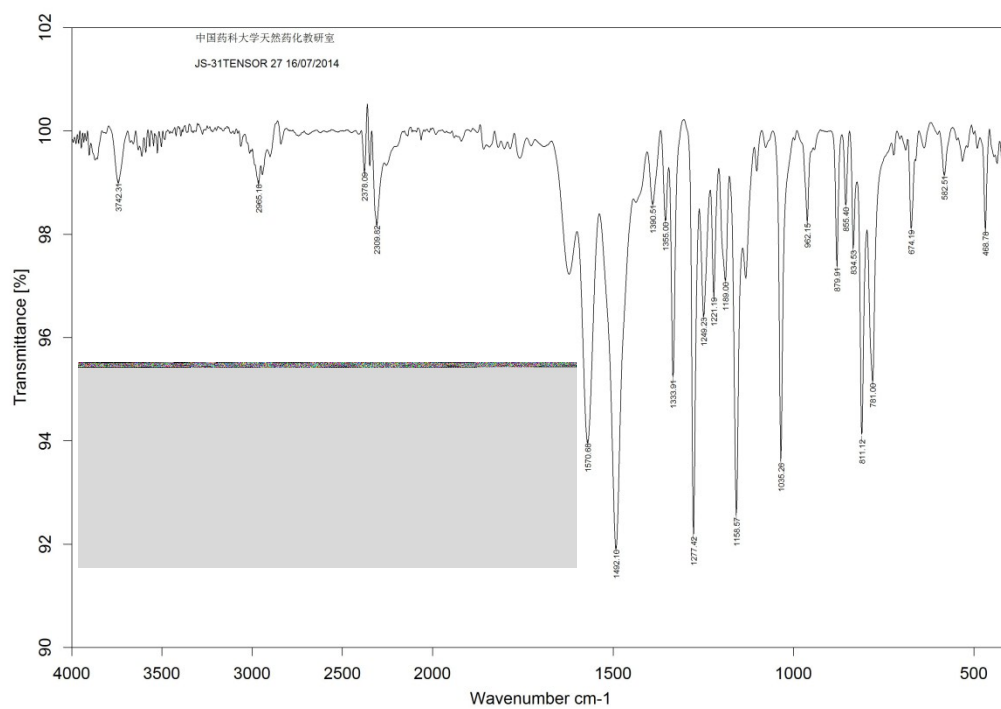

Supplement: c4ra10692j1.pdf [file c4ra10692j1.pdf]
